# Supplementary material for: Epidemiology of diabetes mellitus in Pakistan: a systematic review protocol
Source: PubMed Central journal article supplement — BMJ Open. 2024 Mar 12;14(3):e079513. doi: 10.1136/bmjopen-2023-079513 (PMC10936511; doi:10.1136/bmjopen-2023-079513), 2024-03-12
Supplement: bmjopen-2023-079513.draft_revisions.pdf [file bmjopen-2023-079513.draft_revisions.pdf]

# BMJ Open

BMJ Open is committed to open peer review. As part of this commitment we make the peer review history of every article we publish publicly available.

When an article is published we post the peer reviewers' comments and the authors' responses online. We also post the versions of the paper that were used during peer review. These are the versions that the peer review comments apply to.

The versions of the paper that follow are the versions that were submitted during the peer review process. They are not the versions of record or the final published versions. They should not be cited or distributed as the published version of this manuscript.

BMJ Open is an open access journal and the full, final, typeset and author-corrected version of record of the manuscript is available on our site with no access controls, subscription charges or pay-per-view fees (<http://bmjopen.bmj.com>).

If you have any questions on BMJ Open's open peer review process please email [info.bmjopen@bmj.com](mailto:info.bmjopen@bmj.com)

# BMJ Open

## Epidemiology of Diabetes Mellitus in Pakistan: A Systematic Review Protocol

|                               |                                                                                                                                                                                                |
|-------------------------------|------------------------------------------------------------------------------------------------------------------------------------------------------------------------------------------------|
| Journal:                      | <i>BMJ Open</i>                                                                                                                                                                                |
| Manuscript ID                 | bmjopen-2023-079513                                                                                                                                                                            |
| Article Type:                 | Protocol                                                                                                                                                                                       |
| Date Submitted by the Author: | 03-Sep-2023                                                                                                                                                                                    |
| Complete List of Authors:     | Hasan, Syed Umar; The Aga Khan University, Department of Ophthalmology and Visual Sciences<br>Siddiqui, M. A. Rehman; The Aga Khan University, Department of Ophthalmology and Visual Sciences |
| Keywords:                     | DIABETES & ENDOCRINOLOGY, EPIDEMIOLOGIC STUDIES, Meta-Analysis                                                                                                                                 |
|                               |                                                                                                                                                                                                |

SCHOLARONE™  
Manuscripts

# Epidemiology of Diabetes Mellitus in Pakistan: A Systematic Review Protocol

S. Umar Hasan<sup>1</sup>, M. A. Rehman Siddiqui<sup>1</sup>

<sup>1</sup> Department of Ophthalmology and Visual Sciences,  
Aga Khan University Hospital,  
National Stadium Road, P.O. Box 3500  
Karachi, 74800  
Pakistan

**Corresponding Author:** M. A. Rehman Siddiqui

Department of Ophthalmology and Visual Sciences,  
Aga Khan University Hospital,  
National Stadium Road, P.O. Box 3500  
Karachi, 74800  
Pakistan

Email: [rehman.siddiqui@gmail.com](mailto:rehman.siddiqui@gmail.com)

## Abstract

### Introduction

Diabetes Mellitus (DM) is a chronic metabolic disorder characterized by hyperglycemia resulting from defects in insulin secretion, insulin action, or both. As a major global health concern, its prevalence has been steadily increasing. Pakistan, is no exception to this trend, facing a growing burden of non-communicable diseases (NCDs) including DM. This research aims to comprehensively assess the prevalence of DM in Pakistan, considering its epidemiological context, risk factors, and disparities between rural and urban populations.

### Methods and analysis

The systematic review will follow PRISMA guidelines and will aim to assess DM prevalence in Pakistan. A comprehensive search strategy will be applied to databases like PubMed, Scopus, and other databases from inception up to August 1st, 2023. We will include studies that focus on diabetes prevalence in the general population, employing WHO or ADA criteria. Cross-sectional studies, cohort studies, and population-based surveys with a sample size  $\geq 500$ , in English or Urdu will be considered. Data extraction will be done as per a predefined proforma which will include study details such as demographics, prevalence data, and methodology. Quality assessment will be done using Newcastle Ottawa Scale. A meta-analysis, if appropriate, will pool prevalence estimates, considering heterogeneity and conducting subgroup and sensitivity analyses.

### Ethics and dissemination

The findings from the systematic review will be shared by publishing them in a peer-reviewed journal and showcasing them at a pertinent conference. Our analysis is based on aggregated data and does not involve individual patient information, thus eliminating the need for ethical clearance.

**Keywords:** Diabetes, DM, Prevalence, Epidemiology, Pakistan

**Trial registration number:** PROSPERO CRD42023453085.

**Word count:** 2726

### Strengths and limitations of the study

- Adheres to PRISMA guidelines for systematic reviews and implements a meticulous systematic data extraction process, contributing to the overall comprehensiveness of the review.
- Conducts a comprehensive literature search covering studies published until August 1st, 2023, bolstering the review's reliability.
- Encompasses a wide range of studies by employing both World Health Organization and American Diabetes Association criteria for diagnosing Diabetes Mellitus, thus enhancing the review's external validity.
- Potential for publication bias due to reliance on published studies, which may favor positive or statistically significant results.
- Variations in prevalence estimates across included studies due to differences in study methodologies, studied populations, and diagnostic criteria used.

## 1. Introduction

Diabetes Mellitus (DM) is a chronic metabolic disorder characterized by hyperglycemia resulting from defects in insulin secretion, insulin action, or both (1). It is a major global health concern, with its prevalence steadily increasing in both developed and developing countries (2). Pakistan, as a populous South Asian nation, is no exception to this trend. The country is facing a growing burden of non-communicable diseases (NCDs), and DM has emerged as a significant public health challenge over the past few decades (3).

### 1.1. Pakistani context

#### **Epidemiological Overview:**

Pakistan, as the world's fifth most populous country, faces numerous health challenges, including the rise of NCDs (4). Among these NCDs, DM stands out as a significant health concern due to its increasing prevalence and associated health and economic burdens. According to estimates, Pakistan had approximately 5.2 million adults living with diabetes in 2000 (2), and this number amplified to approximately 33 million in 2021 (5). The World Health Organization (WHO) estimated that in 2016 NCDs accounted for 58% of all deaths in Pakistan (6). The four most prevalent NCDs in Pakistan in 2016 were cardiovascular diseases, cancers, chronic respiratory diseases and diabetes (6). In 2016, it was reported that the total number of deaths directly caused by diabetes were estimated to be 3% (6). However, diabetes also played a significant role in mortality as a risk factor for other NCDs such as cardiovascular diseases and hypertension.

#### **Factors Contributing to the Diabetes Burden:**

Rapid urbanization and shifts in lifestyle patterns have transformed dietary habits, physical activity levels, and overall health behaviors in Pakistan (7). Traditional diets have been replaced by more calorie-dense and processed food options, leading to an increase in obesity rates and other risk factors associated with diabetes (8, 9). Additionally, sedentary occupations, increased usage of technology, and reduced physical activity levels have become prevalent, especially in urban areas. This lifestyle shift has contributed to an increased risk of obesity and diabetes. Pakistan's healthcare system faces several challenges, including limited resources, inadequate healthcare infrastructure, and uneven distribution of medical facilities (10). This can impact early detection,

1  
2  
3 diagnosis, and management of diabetes, particularly in rural and underserved areas. Lack of  
4 awareness and education about diabetes and its risk factors can lead to delayed diagnosis and poor  
5 management (11). Promoting diabetes awareness campaigns and educational programs is crucial  
6 to encourage early detection and effective management of the disease. The prevalence of diabetes  
7 in Pakistan exhibits variations across different age groups and genders (12). Age is a well-  
8 established risk factor for diabetes, and the disease tends to increase with advancing age (12).  
9 Moreover, studies have shown that women in Pakistan may face additional challenges related to  
10 diabetes, such as limited access to healthcare, cultural norms impacting their dietary choices, and  
11 lack of autonomy in healthcare decisions (13, 14). Lastly, diabetes poses a substantial health  
12 burden in Pakistan, with complications such as cardiovascular diseases, kidney failure, blindness,  
13 and lower limb amputations being common (15). These complications not only affect the quality  
14 of life of individuals but also exert significant economic pressure on families and the healthcare  
15 system.  
16  
17  
18  
19  
20  
21  
22  
23  
24  
25  
26

## 27 **1.2. Rural vs Urban population**

28  
29 Pakistan's population is characterized by a diverse mix of urban and rural inhabitants. While urban  
30 centers experience higher levels of industrialization, better access to healthcare facilities, and  
31 potentially greater exposure to risk factors associated with DM, the rural population often faces  
32 unique challenges in terms of access to healthcare, education, and awareness about non-  
33 communicable diseases. These disparities between rural and urban areas could influence the  
34 prevalence and management of DM across different regions in Pakistan (9, 16).  
35  
36  
37  
38  
39  
40

41 Understanding the potential differences in DM prevalence between rural and urban populations is  
42 crucial for designing targeted interventions that consider the specific needs and challenges faced  
43 by each group. It can also inform healthcare policymakers and practitioners about the allocation  
44 of resources and the implementation of preventive measures tailored to the characteristics of  
45 distinct population segments.  
46  
47  
48  
49  
50

## 51 **1.3. Objectives**

52  
53 The primary objective of this systematic review is to provide a comprehensive assessment of the  
54 prevalence of Diabetes Mellitus in Pakistan. Specifically, the review aims to:  
55  
56  
57  
58  
59  
60

- Determine the overall prevalence of DM in the general population of Pakistan.
- Explore variations in DM prevalence based on factors such as age, gender, and geographical location (e.g., provinces, urban vs. rural areas).
- Identify potential temporal trends in DM prevalence over the study period, if sufficient data are available.
- Assess the quality of the studies included in the review to ensure robustness and reliability of the findings.

By synthesizing existing data from diverse sources, this systematic review will contribute to the current understanding of the burden of DM in Pakistan. The findings will be valuable for policymakers, healthcare professionals, and stakeholders in shaping evidence-based strategies for the prevention, management, and control of DM in the country. Furthermore, the review will help identify research gaps and areas requiring further investigation, ultimately supporting evidence-informed decision-making in public health and healthcare policies related to DM in Pakistan.



## 2. Methods and analysis

### 2.1. Study design

This protocol for systematic review is written as Preferred Reporting Items for Systematic Reviews and Meta-Analyses extension for protocol paper (PRISMA-P) (17). This systematic review will follow the Preferred Reporting Items for Systematic Reviews and Meta-Analyses (PRISMA) guidelines (18). The review will be conducted using a rigorous and transparent methodology to ensure the systematic and unbiased synthesis of evidence related to the prevalence of Diabetes Mellitus in Pakistan. The study is registered with PROSPERO (registration number: CRD42023453085) (19).

### 2.2. Selection criteria

#### 2.2.1. Inclusion criteria

The systematic review will encompass studies published from inception up to August 1st, 2023. The primary population of interest will comprise individuals residing in Pakistan, with no restrictions based on age, gender, or ethnicity. Studies conducted in various centers, both regional and national, to ensure a comprehensive representation of the prevalence of Diabetes Mellitus in Pakistan. The review will encompass research that features both patients previously diagnosed with DM as well as those newly diagnosed. The criteria for new cases in these studies should adhere to either the WHO guidelines or the American Diabetes Association (ADA) criteria for diagnosing DM (20, 21). The study designs to be included are cross-sectional studies, cohort studies, and population-based surveys. To ensure language homogeneity and accessibility of data, only studies published in the English and Urdu language will be considered for inclusion in the systematic review.

#### 2.2.2. Exclusion criteria

Studies with a sample size less than 500 will be excluded due to their potential impact on the reliability of prevalence estimates. Studies focusing solely on gestational diabetes or diabetes in specific subpopulations (e.g., diabetic patients with specific comorbidities) will be excluded. Studies that rely solely on self-reported diabetes, that is where the diagnosis of DM is based on data reported by the patient instead of using an authentic diagnostic method (blood testing as defined by WHO or ADA) will be excluded.

### 2.3. Diagnostic criteria

The ADA criteria for the diagnosis of DM comprise of 4 potential criteria.

- i. Glycated hemoglobin (HbA1c)  $\geq 6.5\%$ . The test should be performed in a laboratory using a method that is NGSP certified and standardized to the DCCT assay. In the absence of unequivocal hyperglycemia, diagnosis requires two abnormal test results from the same sample or in two separate test samples.
- ii. Fasting plasma glucose (FPG)  $\geq 126$  mg/dL (7 mmol/L). Fasting is defined as no caloric intake for at least 8 hours. In the absence of unequivocal hyperglycemia, diagnosis requires two abnormal test results from the same sample or in two separate test samples.
- iii. 2-hour plasma glucose  $\geq 200$  mg/dL (11.1 mmol/L) during an oral glucose tolerance test (OGTT). The test should be performed as described by the World Health Organization, using a glucose load containing the equivalent of 75 g anhydrous glucose dissolved in water. In the absence of unequivocal hyperglycemia, diagnosis requires two abnormal test results from the same sample or in two separate test samples.
- iv. In a patient with classic symptoms of hyperglycemia or hyperglycemic crisis, a random plasma glucose  $\geq 200$  mg/dL (11.1 mmol/L).

The WHO criteria for the diagnosis of DM comprise of 5 potential criteria.

- i. Fasting (Overnight fast of 8–14 hours) venous or capillary plasma glucose  $\geq 7.0$  mmol/L (126 mg/dL).
- ii. 2-hour post-load venous plasma glucose  $\geq 11.1$  mmol/L (200 mg/dL)
- iii. 2-hour post-load capillary plasma glucose  $\geq 12.2$  mmol/L (220 mg/dL)
- iv. Random plasma glucose  $\geq 11.1$  mmol/L (200 mg/dL). To be used only in the presence of symptoms.
- v. HbA1c  $\geq 6.5\%$  (48 mmol/mol).

### 2.4. Outcomes

The primary outcome of interest for this systematic review is the prevalence of DM in Pakistan. The prevalence will be expressed as a percentage or proportion of the total population assessed in each study. Additionally, if available, the review will explore the prevalence of diabetes across various subgroups based on age, gender, and geographical location (e.g., provinces, urban vs. rural

1  
2  
3 areas). Additionally, the study will also look into potential confounders associated with diabetes  
4 (e.g., hypertension, family history and obesity) where possible.  
5  
6  
7

## 8 **2.5. Search strategy**

9  
10 A comprehensive search strategy will be developed to identify relevant studies. Literature review  
11 will be carried out by two independent reviewers in the following electronic databases PubMed,  
12 Scopus, Cochrane, PakMediNet and CINAHL. The search strategy will combine relevant  
13 keywords using the Boolean operators (OR and AND) including “diabetes”, “diabetics”, “DM”,  
14 “diabetes Mellitus”, “T2DM”, “prevalence”, and “Pakistan”, “Sind”, “Punjab”, “NWFP”, “Khyber  
15 Pakhtunkhwa”, and “Baluchistan”. The selection process for the articles will follow the PRISMA  
16 guidelines.  
17  
18  
19  
20  
21  
22  
23

## 24 **2.6. Data extraction**

25 Data extraction will be conducted independently by two reviewers using a predefined data  
26 extraction form. The extracted data will include the following information:  
27  
28  
29

- 30 • Study characteristics: author(s), year of publication, study design, and sample size.
- 31 • Population characteristics: age, gender, and location of study participants.
- 32 • Confounders: number of patients with hypertension, family history, overweight, obesity,  
33 dyslipidemia, current cigarette smoking status, and cardiovascular disorder
- 34 • Prevalence data: number of individuals with diabetes, number of patients with prediabetes,  
35 total sample size, and prevalence rates.
- 36 • Methodological details: diagnostic criteria used for diabetes, data collection methods, and  
37 study limitations.  
38  
39  
40  
41  
42  
43  
44  
45

## 46 **2.7. Quality assessment**

47 The quality and risk of bias of included studies will be assessed using appropriate tools. The  
48 Newcastle-Ottawa Scale (NOS) will be utilized for cohort and cross-sectional studies to evaluate  
49 the quality of the selected studies (22). The NOS assesses three domains: selection of study groups,  
50 comparability, and ascertainment of the outcome. Studies will be categorized as low, moderate, or  
51 high quality based on their scores. The Grading of Recommendations, Assessment, Development,  
52  
53  
54  
55  
56  
57  
58  
59

1  
2  
3 and Evaluation (GRADE) tool will be used to assess the certainty of evidence and this evaluation  
4 will be conducted by two independent reviewers (23).  
5  
6  
7

## 8 **2.8. Data analysis**

9

### 10 **2.7.1. Descriptive Analysis**

11  
12 Initially, a descriptive analysis will be conducted to present an overview of the characteristics of  
13 the included studies. This analysis will involve summarizing the study designs, sample sizes, age  
14 groups, gender distribution, geographical locations, and prevalence rates reported in each study.  
15 The data will be tabulated and presented in a narrative format to provide a comprehensive  
16 understanding of the studies included in the review.  
17  
18  
19  
20  
21  
22

### 23 **2.7.2. Prevalence Synthesis**

24

25  
26  
27 The primary objective of the systematic review is to estimate the prevalence of Diabetes Mellitus  
28 in Pakistan. To achieve this, a meta-analysis will be performed, if appropriate. The meta-analysis  
29 aims to pool the prevalence estimates from individual studies to generate an overall summary  
30 estimate of diabetes prevalence in the country. Before conducting the meta-analysis, heterogeneity  
31 among the included studies will be assessed using the  $I^2$  statistic. Heterogeneity measures the  
32 degree of variability in effect sizes (prevalence estimates) across studies. If substantial  
33 heterogeneity is identified ( $I^2 > 50\%$ ), a random-effects model will be employed, considering the  
34 assumption that the true effect sizes may vary between studies due to differences in study  
35 populations, settings, and methodologies. The meta-analysis results will be visually represented  
36 using a forest plot, where each study's prevalence estimate, and its corresponding confidence  
37 interval will be plotted. The overall pooled prevalence and the 95% confidence interval will be  
38 presented. If a considerable level of heterogeneity is observed, subgroup analyses will be  
39 conducted to explore potential sources of variability. Subgroups based on factors such as age  
40 groups, gender, and geographical locations (e.g., provinces, rural vs. urban areas) will be  
41 considered to assess whether prevalence estimates differ significantly between these subgroups.  
42 Sensitivity analyses will be performed to examine the robustness of the results. This involves  
43 repeating the meta-analysis after excluding studies with a high risk of bias or those with small  
44  
45  
46  
47  
48  
49  
50  
51  
52  
53  
54  
55  
56  
57  
58  
59  
60

1  
2  
3 sample sizes to assess the impact of individual studies on the overall pooled prevalence. Potential  
4 publication bias, which refers to the tendency for published studies to be biased towards significant  
5 or positive findings, will be assessed using funnel plots.  
6  
7  
8  
9  
10  
11  
12  
13  
14  
15  
16  
17  
18  
19  
20  
21  
22  
23  
24  
25  
26  
27  
28  
29  
30  
31  
32  
33  
34  
35  
36  
37  
38  
39  
40  
41  
42  
43  
44  
45  
46  
47  
48  
49  
50  
51  
52  
53  
54  
55  
56  
57  
58  
59  
60

For peer review only

### 3. Discussion

The findings of this systematic review hold significant implications for our understanding of the prevalence of DM in Pakistan and its multifaceted impact on public health. The comprehensive synthesis of available data provides insights into the burden of DM across different segments of the population and geographical regions. This discussion section contextualizes the findings, highlights the strengths and limitations of the review, and explores the broader implications for healthcare policies, clinical practice, and future research.

The prevalence estimates synthesized in this review will reflect the dynamic nature of DM in Pakistan's population. The documented variations in prevalence based on age, gender, and geographical regions align with the complex interplay of genetic, lifestyle, and socio-economic factors. It is noteworthy that the increasing prevalence of DM in Pakistan mirrors global trends in urbanization, sedentary lifestyles, and dietary shifts, indicating the need for targeted interventions (24).

Comparing the prevalence rates reported in this review with previous estimates can offer insights into the temporal trends of DM in Pakistan (25, 26). Any significant increase in prevalence over time could signal a growing public health concern and emphasize the urgency of addressing DM as a national priority.

The findings of this systematic review will have direct implications for healthcare policy and clinical practice in Pakistan. A clear understanding of DM prevalence is essential for allocating healthcare resources efficiently and designing preventive strategies tailored to specific populations. Identifying high-risk groups, such as older individuals and those residing in urban areas, allows for targeted interventions and early detection efforts.

Furthermore, the prevalence data can inform healthcare providers about the potential patient load and guide clinical decision-making, including risk assessment and management strategies. For policymakers, the findings underscore the importance of a comprehensive national strategy to tackle DM, encompassing awareness campaigns, improved healthcare infrastructure, and promoting healthy lifestyles.

1  
2  
3  
4  
5 This systematic review identifies several avenues for future research. First, conducting  
6 longitudinal studies could provide insights into the changing prevalence of DM over time and help  
7 identify potential risk factors contributing to its rise. Second, exploring the socio-economic  
8 determinants of DM prevalence and its disparities across different regions can guide equitable  
9 policy formulation. Third, investigating the impact of cultural and lifestyle factors on DM  
10 prevalence among specific subgroups could offer nuanced insights into the disease's epidemiology.  
11  
12  
13  
14  
15  
16

### 17 **3.1. Strengths and Limitations**

18 One of the notable strengths of this systematic review lies in its adherence to the rigorous Preferred  
19 Reporting Items for Systematic Reviews and Meta-Analyses (PRISMA) guidelines (18). The  
20 comprehensive literature search, including studies published up to August 1st, 2023, and the  
21 systematic data extraction process contribute to the reliability and comprehensiveness of the  
22 review. By employing both the World Health Organization (WHO) and American Diabetes  
23 Association (ADA) criteria for diagnosing DM (20, 21), this review encompasses a broad spectrum  
24 of studies, enhancing its external validity.  
25  
26  
27  
28  
29  
30  
31

32 Despite its strengths, this systematic review is not without limitations. The review's dependency  
33 on published studies may introduce publication bias, as studies with positive or statistically  
34 significant results are more likely to be published. The inclusion of studies published in the English  
35 language may lead to language bias, potentially omitting studies in other languages. Furthermore,  
36 the prevalence estimates reported in the included studies may be subject to variations due to  
37 differences in study methodologies, populations studied, and diagnostic criteria used.  
38  
39  
40  
41  
42  
43  
44

### 45 **3.2. Conclusion**

46 In conclusion, this systematic review offers a valuable synthesis of available evidence on the  
47 prevalence of DM in Pakistan. The findings contribute to a deeper understanding of the disease's  
48 burden, variations, and potential risk factors within the Pakistani population. By shedding light on  
49 the prevalence landscape, this review informs healthcare policies, clinical practices, and future  
50 research endeavors aimed at mitigating the impact of DM in Pakistan and improving the overall  
51 health and well-being of its citizens.  
52  
53  
54  
55  
56  
57  
58  
59  
60

## Declarations

## Author Contribution

The idea was conceptualized by M.A.R.S. The literature review was performed by S.U.H. and M.A.R.S. S.U.H. wrote the first of the paper. Both authors approve of the final version of the article.

## Funding Statement

This research received no specific grant from any funding agency in the public, commercial or not-for-profit sectors.

## Competing Interests

The authors declare that they have no competing interests.



## References

1. Diagnosis and classification of diabetes mellitus. *Diabetes Care*. 2010;33 Suppl 1(Suppl 1):S62-9.
2. Wild S, Roglic G, Green A, Sicree R, King H. Global prevalence of diabetes: estimates for the year 2000 and projections for 2030. *Diabetes Care*. 2004;27(5):1047-53.
3. King H, Aubert RE, Herman WH. Global burden of diabetes, 1995-2025: prevalence, numerical estimates, and projections. *Diabetes Care*. 1998;21(9):1414-31.
4. Rivera M. Countries with The Largest Population in 2023: The Race to the Top: SOUTHWEST Journal; [Available from: <https://www.southwestjournal.com/countries-with-the-largest-population/>].
5. Diabetes in Pakistan (2021): International Diabetes Federation (IDF); [Available from: <https://idf.org/our-network/regions-and-members/middle-east-and-north-africa/members/pakistan/>].
6. Organization WH. Noncommunicable diseases Pakistan 2018 country profile 2018 [Available from: [https://cdn.who.int/media/docs/default-source/country-profiles/ncds/pak\\_en.pdf?sfvrsn=365b2b11\\_39&download=true](https://cdn.who.int/media/docs/default-source/country-profiles/ncds/pak_en.pdf?sfvrsn=365b2b11_39&download=true)].
7. McKeigue PM, Shah B, Marmot MG. Relation of central obesity and insulin resistance with high diabetes prevalence and cardiovascular risk in South Asians. *Lancet*. 1991;337(8738):382-6.
8. Iqbal N. The burden of type 2 diabetes: strategies to prevent or delay onset. *Vasc Health Risk Manag*. 2007;3(4):511-20.
9. Shera AS, Jawad F, Maqsood A. Prevalence of diabetes in Pakistan. *Diabetes Res Clin Pract*. 2007;76(2):219-22.
10. Rashid M Ansari JBD, Jan Coles. Type 2 diabetes: Challenges to health care system of Pakistan. *International Journal of Diabetes Research*. 2015;4(1):7-12.
11. Rafique G, Azam SI, White F. Diabetes knowledge, beliefs and practices among people with diabetes attending a university hospital in Karachi, Pakistan. *East Mediterr Health J*. 2006;12(5):590-8.
12. Basit A, Tanveer S, Fawwad A, Naeem N. Prevalence and contributing risk factors for hypertension in urban and rural areas of Pakistan; a study from second National Diabetes Survey of Pakistan (NDSP) 2016-2017. *Clin Exp Hypertens*. 2020;42(3):218-24.
13. Abuelmagd W, Håkonsen H, Mahmood KQ, Taghizadeh N, Toverud EL. Living with Diabetes: Personal Interviews with Pakistani Women in Norway. *J Immigr Minor Health*. 2018;20(4):848-53.
14. Ansari RM, Hosseinzadeh H, Harris M, Zwar N. Self-management experiences among middle-aged population of rural area of Pakistan with type 2 diabetes: A qualitative analysis. *Clinical Epidemiology and Global Health*. 2019;7(2):177-83.
15. Hippisley-Cox J, Coupland C. Diabetes treatments and risk of amputation, blindness, severe kidney failure, hyperglycaemia, and hypoglycaemia: open cohort study in primary care. *Bmj*. 2016;352:i1450.
16. Meo SA, Zia I, Bukhari IA, Arain SA. Type 2 diabetes mellitus in Pakistan: Current prevalence and future forecast. *J Pak Med Assoc*. 2016;66(12):1637-42.
17. Shamseer L, Moher D, Clarke M, Ghersi D, Liberati A, Petticrew M, et al. Preferred reporting items for systematic review and meta-analysis protocols (PRISMA-P) 2015: elaboration and explanation. *Bmj*. 2015;350:g7647.
18. Page MJ, McKenzie JE, Bossuyt PM, Boutron I, Hoffmann TC, Mulrow CD, et al. The PRISMA 2020 statement: an updated guideline for reporting systematic reviews. *Bmj*. 2021;372:n71.
19. Hasan SU, Siddiqui MAR. Epidemiology of Diabetes Mellitus in Pakistan: A Systematic Review Protocol: PROSPERO; 2023 [Available from: [https://www.crd.york.ac.uk/PROSPERO/display\\_record.php?RecordID=453085](https://www.crd.york.ac.uk/PROSPERO/display_record.php?RecordID=453085)].

- 1  
2  
3 20. Association AD. Diagnosis and classification of diabetes mellitus. *Diabetes care*.  
4 2010;33(Supplement\_1):S62-S9.  
5 21. Organization WH. Definition and diagnosis of diabetes mellitus and intermediate  
6 hyperglycaemia: report of a WHO/IDF consultation. 2006.  
7 22. Wells GA, Shea B, O'Connell D, Peterson J, Welch V, Losos M, et al. The Newcastle-Ottawa Scale  
8 (NOS) for assessing the quality of nonrandomised studies in meta-analyses. 2000.  
9 23. GDT G. GRADEpro Guideline Development Tool [Software]: McMaster University and Evidence  
10 Prime; 2022 [Available from: [grade.org](http://grade.org).  
11 24. Mehboob B, Safdar NF, Zaheer S. Socio-economic, environmental and demographic  
12 determinants of rise in obesity among Pakistani women: a systematic review. *J Pak Med Assoc*.  
13 2016;66(9):1165-72.  
14 25. Akhtar S, Nasir JA, Abbas T, Sarwar A. Diabetes in Pakistan: A systematic review and meta-  
15 analysis. *Pak J Med Sci*. 2019;35(4):1173-8.  
16 26. Meo SA, Zia I, Bukhari IA, Arain SA. Type 2 diabetes mellitus in Pakistan: Current prevalence and  
17 future forecast. *J Pak Med Assoc*. 2016;66(12):1637-42.  
18  
19  
20  
21  
22  
23  
24  
25  
26  
27  
28  
29  
30  
31  
32  
33  
34  
35  
36  
37  
38  
39  
40  
41  
42  
43  
44  
45  
46  
47  
48  
49  
50  
51  
52  
53  
54  
55  
56  
57  
58  
59  
60

# Reporting checklist for protocol of a systematic review and meta analysis.

Based on the PRISMA-P guidelines.

## Instructions to authors

Complete this checklist by entering the page numbers from your manuscript where readers will find each of the items listed below.

Your article may not currently address all the items on the checklist. Please modify your text to include the missing information. If you are certain that an item does not apply, please write "n/a" and provide a short explanation.

Upload your completed checklist as an extra file when you submit to a journal.

In your methods section, say that you used the PRISMA-Reporting guidelines, and cite them as:

Moher D, Shamseer L, Clarke M, Ghersi D, Liberati A, Petticrew M, Shekelle P, Stewart LA. Preferred Reporting Items for Systematic Review and Meta-Analysis Protocols (PRISMA-P) 2015 statement. *Syst Rev.* 2015;4(1):1.

| Reporting Item      |                     |                                                                                                                                           | Page Number |
|---------------------|---------------------|-------------------------------------------------------------------------------------------------------------------------------------------|-------------|
| <b>Title</b>        |                     |                                                                                                                                           |             |
| Identification      | <a href="#">#1a</a> | Identify the report as a protocol of a systematic review                                                                                  | 1           |
| Update              | <a href="#">#1b</a> | If the protocol is for an update of a previous systematic review, identify as such                                                        | NA          |
| <b>Registration</b> |                     |                                                                                                                                           |             |
|                     | <a href="#">#2</a>  | If registered, provide the name of the registry (such as PROSPERO) and registration number                                                | 2           |
| <b>Authors</b>      |                     |                                                                                                                                           |             |
| Contact             | <a href="#">#3a</a> | Provide name, institutional affiliation, e-mail address of all protocol authors; provide physical mailing address of corresponding author | 1           |
| Contribution        | <a href="#">#3b</a> | Describe contributions of protocol authors and identify the guarantor of the review                                                       | 14          |

## Amendments

|  |                    |                                                                                                                                                                                                 |    |
|--|--------------------|-------------------------------------------------------------------------------------------------------------------------------------------------------------------------------------------------|----|
|  | <a href="#">#4</a> | If the protocol represents an amendment of a previously completed or published protocol, identify as such and list changes; otherwise, state plan for documenting important protocol amendments | NA |
|--|--------------------|-------------------------------------------------------------------------------------------------------------------------------------------------------------------------------------------------|----|

## Support

|                           |                     |                                                                                                      |    |
|---------------------------|---------------------|------------------------------------------------------------------------------------------------------|----|
| Sources                   | <a href="#">#5a</a> | Indicate sources of financial or other support for the review                                        | 14 |
| Sponsor                   | <a href="#">#5b</a> | Provide name for the review funder and / or sponsor                                                  | 14 |
| Role of sponsor or funder | <a href="#">#5c</a> | Describe roles of funder(s), sponsor(s), and / or institution(s), if any, in developing the protocol | 14 |

## Introduction

|            |                    |                                                                                                                                                          |      |
|------------|--------------------|----------------------------------------------------------------------------------------------------------------------------------------------------------|------|
| Rationale  | <a href="#">#6</a> | Describe the rationale for the review in the context of what is already known                                                                            | 4, 5 |
| Objectives | <a href="#">#7</a> | Provide an explicit statement of the question(s) the review will address with reference to participants, interventions, comparators, and outcomes (PICO) | 5, 6 |

## Methods

|                                   |                      |                                                                                                                                                                                                                               |    |
|-----------------------------------|----------------------|-------------------------------------------------------------------------------------------------------------------------------------------------------------------------------------------------------------------------------|----|
| Eligibility criteria              | <a href="#">#8</a>   | Specify the study characteristics (such as PICO, study design, setting, time frame) and report characteristics (such as years considered, language, publication status) to be used as criteria for eligibility for the review | 7  |
| Information sources               | <a href="#">#9</a>   | Describe all intended information sources (such as electronic databases, contact with study authors, trial registers or other grey literature sources) with planned dates of coverage                                         | 9  |
| Search strategy                   | <a href="#">#10</a>  | Present draft of search strategy to be used for at least one electronic database, including planned limits, such that it could be repeated                                                                                    | NA |
| Study records - data management   | <a href="#">#11a</a> | Describe the mechanism(s) that will be used to manage records and data throughout the review                                                                                                                                  | NA |
| Study records - selection process | <a href="#">#11b</a> | State the process that will be used for selecting studies (such as two independent reviewers) through each phase of the review (that is, screening, eligibility and inclusion in meta-analysis)                               | 9  |
| Study records - data              | <a href="#">#11c</a> | Describe planned method of extracting data from reports (such as                                                                                                                                                              | 9  |

|    |                    |                      |                                                                           |       |
|----|--------------------|----------------------|---------------------------------------------------------------------------|-------|
| 1  | collection process |                      | piloting forms, done independently, in duplicate), any processes for      |       |
| 2  |                    |                      | obtaining and confirming data from investigators                          |       |
| 3  |                    |                      |                                                                           |       |
| 4  | Data items         | <a href="#">#12</a>  | List and define all variables for which data will be sought (such as      | 9     |
| 5  |                    |                      | PICO items, funding sources), any pre-planned data assumptions and        |       |
| 6  |                    |                      | simplifications                                                           |       |
| 7  |                    |                      |                                                                           |       |
| 8  |                    |                      |                                                                           |       |
| 9  | Outcomes and       | <a href="#">#13</a>  | List and define all outcomes for which data will be sought, including     | 8, 9  |
| 10 | prioritization     |                      | prioritization of main and additional outcomes, with rationale            |       |
| 11 |                    |                      |                                                                           |       |
| 12 |                    |                      |                                                                           |       |
| 13 | Risk of bias in    | <a href="#">#14</a>  | Describe anticipated methods for assessing risk of bias of individual     | 9, 10 |
| 14 | individual studies |                      | studies, including whether this will be done at the outcome or study      |       |
| 15 |                    |                      | level, or both; state how this information will be used in data synthesis |       |
| 16 |                    |                      |                                                                           |       |
| 17 |                    |                      |                                                                           |       |
| 18 | Data synthesis     | <a href="#">#15a</a> | Describe criteria under which study data will be quantitatively           | 10    |
| 19 |                    |                      | synthesised                                                               |       |
| 20 |                    |                      |                                                                           |       |
| 21 |                    |                      |                                                                           |       |
| 22 | Data synthesis     | <a href="#">#15b</a> | If data are appropriate for quantitative synthesis, describe planned      | 10    |
| 23 |                    |                      | summary measures, methods of handling data and methods of                 |       |
| 24 |                    |                      | combining data from studies, including any planned exploration of         |       |
| 25 |                    |                      | consistency (such as I <sup>2</sup> , Kendall's $\tau$ )                  |       |
| 26 |                    |                      |                                                                           |       |
| 27 |                    |                      |                                                                           |       |
| 28 |                    |                      |                                                                           |       |
| 29 | Data synthesis     | <a href="#">#15c</a> | Describe any proposed additional analyses (such as sensitivity or         | 10    |
| 30 |                    |                      | subgroup analyses, meta-regression)                                       |       |
| 31 |                    |                      |                                                                           |       |
| 32 |                    |                      |                                                                           |       |
| 33 | Data synthesis     | <a href="#">#15d</a> | If quantitative synthesis is not appropriate, describe the type of        | 10    |
| 34 |                    |                      | summary planned                                                           |       |
| 35 |                    |                      |                                                                           |       |
| 36 |                    |                      |                                                                           |       |
| 37 | Meta-bias(es)      | <a href="#">#16</a>  | Specify any planned assessment of meta-bias(es) (such as publication      | 11    |
| 38 |                    |                      | bias across studies, selective reporting within studies)                  |       |
| 39 |                    |                      |                                                                           |       |
| 40 |                    |                      |                                                                           |       |
| 41 | Confidence in      | <a href="#">#17</a>  | Describe how the strength of the body of evidence will be assessed        | 9     |
| 42 | cumulative         |                      | (such as GRADE)                                                           |       |
| 43 | evidence           |                      |                                                                           |       |
| 44 |                    |                      |                                                                           |       |
| 45 |                    |                      |                                                                           |       |

46 The PRISMA-P elaboration and explanation paper is distributed under the terms of the Creative Commons  
 47 Attribution License CC-BY. This checklist was completed on 01. September 2023 using  
 48 <https://www.goodreports.org/>, a tool made by the [EQUATOR Network](#) in collaboration with [Penelope.ai](#)  
 49

# BMJ Open

## Epidemiology of Diabetes Mellitus in Pakistan: A Systematic Review Protocol

|                                 |                                                                                                                                                                                                |
|---------------------------------|------------------------------------------------------------------------------------------------------------------------------------------------------------------------------------------------|
| Journal:                        | <i>BMJ Open</i>                                                                                                                                                                                |
| Manuscript ID                   | bmjopen-2023-079513.R1                                                                                                                                                                         |
| Article Type:                   | Protocol                                                                                                                                                                                       |
| Date Submitted by the Author:   | 27-Jan-2024                                                                                                                                                                                    |
| Complete List of Authors:       | Hasan, Syed Umar; The Aga Khan University, Department of Ophthalmology and Visual Sciences<br>Siddiqui, M. A. Rehman; The Aga Khan University, Department of Ophthalmology and Visual Sciences |
| <b>Primary Subject Heading</b>: | Diabetes and endocrinology                                                                                                                                                                     |
| Secondary Subject Heading:      | Epidemiology                                                                                                                                                                                   |
| Keywords:                       | DIABETES & ENDOCRINOLOGY, EPIDEMIOLOGIC STUDIES, Meta-Analysis                                                                                                                                 |
|                                 |                                                                                                                                                                                                |

SCHOLARONE™  
Manuscripts

# Epidemiology of Diabetes Mellitus in Pakistan: A Systematic Review Protocol

S. Umar Hasan<sup>1</sup>, M. A. Rehman Siddiqui<sup>1</sup>

<sup>1</sup> Department of Ophthalmology and Visual Sciences,  
Aga Khan University Hospital,  
National Stadium Road, P.O. Box 3500  
Karachi, 74800  
Pakistan

**Corresponding Author:** M. A. Rehman Siddiqui

Department of Ophthalmology and Visual Sciences,  
Aga Khan University Hospital,  
National Stadium Road, P.O. Box 3500  
Karachi, 74800  
Pakistan

Email: [rehman.siddiqui@gmail.com](mailto:rehman.siddiqui@gmail.com)

## Abstract

### Introduction

Diabetes Mellitus (DM) is a chronic metabolic disorder characterized by hyperglycemia resulting from defects in insulin secretion, insulin action, or both. As a major global health concern, its prevalence has been steadily increasing. Pakistan, is no exception to this trend, facing a growing burden of non-communicable diseases (NCDs) including DM. This research aims to comprehensively assess the prevalence of DM, disparities between rural and urban populations as well as between males and females in Pakistan.

### Methods and analysis

The systematic review will follow PRISMA guidelines and will aim to assess DM prevalence in Pakistan. A comprehensive search strategy will be applied to databases like PubMed, Scopus, Cochrane, PakMediNet, and CINAHL from inception up to August 1st, 2023. We will include studies that focus on diabetes prevalence in the general population, employing WHO or ADA criteria of diagnosis of DM. Cross-sectional studies, cohort studies, and population-based surveys with a sample size  $\geq 500$ , in English will be considered. Data extraction will be done as per a predefined proforma which will include study details such as demographics, prevalence data, and methodology. A meta-analysis, if appropriate, will be performed using inverse variance random effect model, considering heterogeneity and conducting subgroup and sensitivity analyses.

### Ethics and dissemination

The findings from the systematic review will be shared by publishing them in a peer-reviewed journal and showcasing them at a pertinent conference. Our analysis will be based on aggregated data and will not involve individual patient information, thus eliminating the need for ethical clearance.

**Keywords:** Diabetes, DM, Prevalence, Epidemiology, Pakistan

**Trial registration number:** PROSPERO CRD42023453085.

**Word count:** 2786



### Strengths and limitations of the study

- Adheres to PRISMA guidelines for systematic reviews and implements a meticulous systematic data extraction process, contributing to the overall comprehensiveness of the review.
- Conducts a comprehensive literature search covering studies published until August 1st, 2023, bolstering the review's reliability.
- Encompasses a wide range of studies by employing both World Health Organization and American Diabetes Association criteria for diagnosing Diabetes Mellitus, thus enhancing the review's external validity.
- Potential for publication bias due to reliance on published studies, which may favor positive or statistically significant results.
- Variations in prevalence estimates across included studies due to differences in study methodologies, studied populations, and diagnostic criteria used.

## 1. Introduction

Diabetes Mellitus (DM) is a chronic metabolic disorder characterized by hyperglycemia resulting from defects in insulin secretion, insulin action, or both (1). It is a major global health concern, with its prevalence steadily increasing in both developed and developing countries (2). Pakistan, as a populous South Asian nation, is no exception to this trend. The country is facing a growing burden of non-communicable diseases (NCDs), and DM has emerged as a significant public health challenge over the past few decades (3).

### 1.1. Pakistani context

#### **Epidemiological Overview:**

Pakistan, as the world's fifth most populous country, faces numerous health challenges, including the rise of NCDs (4). Among these NCDs, DM stands out as a significant health concern due to its increasing prevalence and associated health and economic burdens. According to estimates, Pakistan had approximately 5.2 million adults living with diabetes in 2000 (2), and this number amplified to approximately 32,964,500 in 2021 (5). The World Health Organization (WHO) estimated that in 2016 NCDs accounted for 58% of all deaths in Pakistan (6). The four most prevalent NCDs in Pakistan in 2016 were cardiovascular diseases, cancers, chronic respiratory diseases and diabetes (6). In 2016, it was reported that the total number of deaths directly caused by diabetes were estimated to be 3% (6). However, diabetes also played a significant role in mortality as a risk factor for other NCDs such as cardiovascular diseases and hypertension.

#### **Factors Contributing to the Diabetes Burden:**

Rapid urbanization and shifts in lifestyle patterns have transformed dietary habits, physical activity levels, and overall health behaviors in Pakistan (7). Traditional diets have been replaced by more calorie-dense and processed food options, leading to an increase in obesity rates and other risk factors associated with diabetes (8, 9). Additionally, sedentary occupations, increased usage of technology, and reduced physical activity levels have become prevalent, especially in urban areas. This lifestyle shift has contributed to an increased risk of obesity and diabetes. Pakistan's healthcare system faces several challenges, including limited resources, inadequate healthcare infrastructure, and uneven distribution of medical facilities (10). This can impact early detection,

1  
2  
3 diagnosis, and management of diabetes, particularly in rural and underserved areas. Lack of  
4 awareness and education about diabetes and its risk factors can lead to delayed diagnosis and poor  
5 management (11). Promoting diabetes awareness campaigns and educational programs is crucial  
6 to encourage early detection and effective management of the disease. The prevalence of diabetes  
7 in Pakistan exhibits variations across different age groups and genders (12). Age is a well-  
8 established risk factor for diabetes, and the disease tends to increase with advancing age (12).  
9 Moreover, studies have shown that women in Pakistan may face additional challenges related to  
10 diabetes, such as limited access to healthcare, cultural norms impacting their dietary choices, and  
11 lack of autonomy in healthcare decisions (13, 14). Lastly, diabetes poses a substantial health  
12 burden in Pakistan, with complications such as cardiovascular diseases, kidney failure, blindness,  
13 and lower limb amputations being common (15). These complications not only affect the quality  
14 of life of individuals but also exert significant economic pressure on families and the healthcare  
15 system.  
16  
17  
18  
19  
20  
21  
22  
23  
24  
25  
26

## 27 **1.2. Rural vs Urban population**

28  
29 Pakistan's population is characterized by a diverse mix of urban and rural inhabitants. While urban  
30 centers experience higher levels of industrialization, better access to healthcare facilities, and  
31 potentially greater exposure to risk factors associated with DM, the rural population often faces  
32 unique challenges in terms of access to healthcare, education, and awareness about non-  
33 communicable diseases. These disparities between rural and urban areas could influence the  
34 prevalence and management of DM across different regions in Pakistan (9, 16).  
35  
36  
37  
38  
39  
40

41 Understanding the potential differences in DM prevalence between rural and urban populations is  
42 crucial for designing targeted interventions that consider the specific needs and challenges faced  
43 by each group. It can also inform healthcare policymakers and practitioners about the allocation  
44 of resources and the implementation of preventive measures tailored to the characteristics of  
45 distinct population segments.  
46  
47  
48  
49  
50

## 51 **1.3. Objectives**

52  
53 The primary objective of this systematic review is to provide a comprehensive assessment of the  
54 prevalence of Diabetes Mellitus in Pakistan. Specifically, the review aims to:  
55  
56  
57  
58  
59  
60

- Determine the overall prevalence of DM in the general population of Pakistan.
- Explore variations in DM prevalence based on factors such as age, gender, and geographical location (e.g., provinces, urban vs. rural areas).
- Identify potential temporal trends in DM prevalence over the study period if sufficient data are available.
- Assess the quality of the studies included in the review to ensure robustness and reliability of the findings.

By synthesizing existing data from diverse sources, this systematic review will contribute to the current understanding of the burden of DM in Pakistan. The findings will be valuable for policymakers, healthcare professionals, and stakeholders in shaping evidence-based strategies for the prevention, management, and control of DM in the country. Furthermore, the review will help identify research gaps and areas requiring further investigation, ultimately supporting evidence-informed decision-making in public health and healthcare policies related to DM in Pakistan.

The seminal work by Akhtar et al. (17) diligently outlined the prevalence of diabetes and prediabetes across Pakistan. However, the landscape of diabetes epidemiology is dynamic, marked by evolving trends and nuanced demographic variations that necessitate a comprehensive reevaluation. This current study seeks to diverge from Akhtar et al.'s (17) singular focus on prevalence by undertaking a longitudinal exploration of the shifting prevalence rates of diabetes over time. Moreover, it aims to dissect gender-based and regional based disparities by meticulously analyzing the prevalence of diabetes and prediabetes in both males and females, dissecting potential variations that might exist between these cohorts.

## 2. Methods and analysis

### 2.1. Study design

This is a protocol paper designed for a systematic review, it adheres to the guidelines outlined in the Preferred Reporting Items for Systematic Reviews and Meta-Analyses extension for protocol papers (PRISMA-P) (18). The systematic review that follows will also adhere to the PRISMA guidelines (19). The review will be conducted using a rigorous and transparent methodology to ensure the systematic and unbiased synthesis of evidence related to the prevalence of Diabetes Mellitus in Pakistan. The study is registered with PROSPERO (registration number: CRD42023453085) (20).

### 2.2. Selection criteria

#### 2.2.1. Inclusion criteria

The systematic review will encompass studies published from inception up to August 1st, 2023. The primary population of interest will comprise individuals residing in Pakistan, with no restrictions based on age, gender, or ethnicity. Studies conducted in various centers, both regional and national, to ensure a comprehensive representation of the prevalence of Diabetes Mellitus in Pakistan. The review will encompass research that features both patients previously diagnosed with DM as well as those newly diagnosed. The criteria for new cases in these studies should adhere to either the WHO guidelines or the American Diabetes Association (ADA) criteria for diagnosing DM (1, 21). The study designs to be included are cross-sectional studies, cohort studies, and population-based surveys. To ensure language homogeneity and accessibility of data, only studies published in the English language will be considered for inclusion in the systematic review.

#### 2.2.2. Exclusion criteria

Studies with a sample size less than 500 will be excluded due to their potential impact on the reliability of prevalence estimates. Studies focusing solely on gestational diabetes or diabetes in specific subpopulations (e.g., diabetic patients with specific comorbidities) will be excluded. Studies that rely solely on self-reported diabetes, that is where the diagnosis of DM is based on data reported by the patient instead of using an authentic diagnostic method (blood testing as defined by WHO or ADA) will be excluded.

### 2.3. Diagnostic criteria

The ADA criteria for the diagnosis of DM comprise of 4 potential criteria.

- i. Glycated hemoglobin (HbA1c)  $\geq 6.5\%$ . The test should be performed in a laboratory using a method that is National Glycohemoglobin Standardization Program (NGSP) certified and standardized to the Diabetes Control and Complications Trial (DCCT) assay. In the absence of unequivocal hyperglycemia, diagnosis requires two abnormal test results from the same sample or in two separate test samples.
- ii. Fasting plasma glucose (FPG)  $\geq 126$  mg/dL (7 mmol/L). Fasting is defined as no caloric intake for at least 8 hours. In the absence of unequivocal hyperglycemia, diagnosis requires two abnormal test results from the same sample or in two separate test samples.
- iii. 2-hour plasma glucose  $\geq 200$  mg/dL (11.1 mmol/L) during an oral glucose tolerance test (OGTT). The test should be performed as described by the World Health Organization, using a glucose load containing the equivalent of 75 g anhydrous glucose dissolved in water. In the absence of unequivocal hyperglycemia, diagnosis requires two abnormal test results from the same sample or in two separate test samples.
- iv. In a patient with classic symptoms of hyperglycemia or hyperglycemic crisis, a random plasma glucose  $\geq 200$  mg/dL (11.1 mmol/L).

The WHO criteria for the diagnosis of DM comprise of 5 potential criteria.

- i. Fasting (Overnight fast of 8–14 hours) venous or capillary plasma glucose  $\geq 7.0$  mmol/L (126 mg/dL).
- ii. 2-hour post-load venous plasma glucose  $\geq 11.1$  mmol/L (200 mg/dL)
- iii. 2-hour post-load capillary plasma glucose  $\geq 12.2$  mmol/L (220 mg/dL)
- iv. Random plasma glucose  $\geq 11.1$  mmol/L (200 mg/dL). To be used only in the presence of symptoms.
- v. HbA1c  $\geq 6.5\%$  (48 mmol/mol).

### 2.4. Outcomes

The primary outcome of interest for this systematic review is the prevalence of DM in Pakistan.

The prevalence will be expressed as a proportion expressed as percentage of the total population

assessed in each study. Additionally, the study will also look into potential confounders associated with diabetes (e.g., hypertension, family history and obesity) where possible.

## 2.5. Search strategy

Literature review will be carried out by two independent reviewers in the following electronic databases PubMed, Scopus, Cochrane, PakMediNet and CINAHL. The search strategy will combine relevant keywords using the Boolean operators (OR and AND) including “diabetes”, “diabetics”, “DM”, “diabetes Mellitus”, “T2DM”, “prevalence”, and “Pakistan”, “Sind”, “Punjab”, “NWFP”, “Khyber Pakhtunkhwa”, and “Baluchistan”. (Supplementary material) The selection process for the articles will follow the PRISMA guidelines.

## 2.6. Data extraction

Data extraction will be conducted independently by two reviewers using a predefined data extraction form. The extracted data will include the following information:

- Study characteristics: author(s), year of publication, study design, and sample size.
- Population characteristics: age, gender, and location of study participants.
- Risk factors: number of patients with hypertension, family history, overweight, obesity, dyslipidemia, current cigarette smoking status, and cardiovascular disorder
- Prevalence data: number of individuals with diabetes, number of patients with prediabetes, total sample size, and prevalence.
- Methodological details: diagnostic criteria used for diabetes, data collection methods, and study limitations.

## 2.7. Quality assessment

The quality and risk of bias of included studies will be assessed using appropriate tools. Joanna Briggs Institute critical appraisal checklist for studies reporting prevalence data will be utilized for cohort and cross-sectional studies to evaluate the quality of the selected studies (22). The Grading of Recommendations, Assessment, Development, and Evaluation (GRADE) tool will be used to assess the certainty of evidence and this evaluation will be conducted by two independent reviewers (23).

## 2.8. Data analysis

### 2.7.1. Descriptive Analysis

Initially, a descriptive analysis will be conducted to present an overview of the characteristics of the included studies. This analysis will involve summarizing the study designs, sample sizes, age groups, gender distribution, geographical locations, and prevalence rates reported in each study. The data will be tabulated and presented in a narrative format to provide a comprehensive understanding of the studies included in the review.

### 2.7.2. Prevalence Synthesis

The primary objective of the systematic review is to estimate the prevalence of Diabetes Mellitus in Pakistan. To achieve this, a meta-analysis will be performed, if appropriate. The meta-analysis aims to pool the prevalence estimates from individual studies to generate an overall summary estimate of diabetes prevalence in the country using the inverse variance-weighted method. Before conducting the meta-analysis, heterogeneity among the included studies will be assessed using the  $I^2$  statistic. Heterogeneity measures the degree of variability in effect sizes (prevalence estimates) across studies. If substantial heterogeneity is identified ( $I^2 > 50\%$ ), a random-effects model will be employed, considering the assumption that the true effect sizes may vary between studies due to differences in study populations, settings, and methodologies. The meta-analysis results will be visually represented using a forest plot, where each study's prevalence estimate, and its corresponding confidence interval will be plotted. The overall prevalence and the 95% confidence interval will be presented. If a considerable level of heterogeneity is observed, subgroup analyses will be conducted to explore potential sources of variability. Subgroups based on factors such as age groups, gender, and geographical locations (e.g., provinces, rural vs. urban areas) will be considered to assess whether prevalence estimates differ significantly between these subgroups. Additionally, to assess the temporal trends, studies will be divided into different groups based on the year the WHO criteria was updated for the diagnosis of DM. Sensitivity analyses will be performed to examine the robustness of the results. This involves repeating the meta-analysis after excluding studies with a high risk of bias or those with small sample sizes to assess the impact of



1  
2  
3 individual studies on the overall prevalence. Potential publication bias, which refers to the  
4 tendency for published studies to be biased towards significant or positive findings, will be  
5 assessed using funnel plots.  
6  
7  
8  
9

### 10 3. **Patient and Public Involvement**

11 No patient will be involved.  
12  
13  
14

### 15 4. **Ethics and Dissemination**

16 The findings from the systematic review will be shared by publishing them in a peer-reviewed  
17 journal and showcasing them at a pertinent conference. Our analysis will be based on aggregated  
18 data and will not involve individual patient information, thus eliminating the need for ethical  
19 clearance.  
20  
21  
22  
23  
24  
25  
26  
27  
28  
29  
30  
31  
32  
33  
34  
35  
36  
37  
38  
39  
40  
41  
42  
43  
44  
45  
46  
47  
48  
49  
50  
51  
52  
53  
54  
55  
56  
57  
58  
59  
60

## 5. Discussion

The findings of this systematic review will hold significant implications for our understanding of the prevalence of DM in Pakistan and its multifaceted impact on public health. The comprehensive synthesis of available data will provide insights into the burden of DM across different segments of the population and geographical regions. This discussion section highlights the strengths and limitations of the review, and explores the broader implications for healthcare policies, clinical practice, and future research.

The prevalence estimates synthesized in this review will reflect the dynamic nature of DM in Pakistan's population. The documented variations in prevalence based on age, gender, and geographical regions align with the complex interplay of genetic, lifestyle, and socio-economic factors. It is noteworthy that the increasing prevalence of DM in Pakistan mirrors global trends in urbanization, sedentary lifestyles, and dietary shifts, indicating the need for targeted interventions (24).

Comparing the prevalence rates as a result of this review with previous estimates can offer insights into the temporal trends of DM in Pakistan (17, 25). Any significant increase in prevalence over time could signal a growing public health concern and emphasize the urgency of addressing DM as a national priority.

The findings of this systematic review will have direct implications for healthcare policy and clinical practice in Pakistan. A clear understanding of DM prevalence is essential for allocating healthcare resources efficiently and designing preventive strategies tailored to specific populations. Identifying high-risk groups, such as older individuals and those residing in urban areas, allows for targeted interventions and early detection efforts.

Furthermore, the prevalence data can inform healthcare providers about the potential patient load and guide clinical decision-making, including risk assessment and management strategies. For policymakers, the findings underscore the importance of a comprehensive national strategy to tackle DM, encompassing awareness campaigns, improved healthcare infrastructure, and promoting healthy lifestyles.

1  
2  
3  
4  
5 This systematic review may help identify several avenues for future research. First, conducting  
6 longitudinal studies could provide insights into the changing prevalence of DM over time and help  
7 identify potential risk factors contributing to its rise. Second, exploring the socio-economic  
8 determinants of DM prevalence and its disparities across different regions can guide equitable  
9 policy formulation. Third, investigating the impact of cultural and lifestyle factors on DM  
10 prevalence among specific subgroups could offer nuanced insights into the disease's epidemiology.  
11  
12  
13  
14  
15  
16

### 17 **5.1. Strengths and Limitations**

18 One of the notable strengths of this systematic review lies in its adherence to the rigorous Preferred  
19 Reporting Items for Systematic Reviews and Meta-Analyses (PRISMA) guidelines (19). The  
20 comprehensive literature search, including studies published up to August 1st, 2023, and the  
21 systematic data extraction process contribute to the reliability and comprehensiveness of the  
22 review. By employing both the World Health Organization (WHO) and American Diabetes  
23 Association (ADA) criteria for diagnosing DM (21, 26), this review encompasses a broad spectrum  
24 of studies, enhancing its external validity.  
25  
26  
27  
28  
29  
30  
31

32 Despite its strengths, this systematic review is not without limitations. The review's dependency  
33 on published studies may introduce publication bias, as studies with positive or statistically  
34 significant results are more likely to be published. The inclusion of studies published in the English  
35 language may lead to language bias, potentially omitting studies in other languages. Furthermore,  
36 the prevalence estimates reported in the included studies may be subject to variations due to  
37 differences in study methodologies, populations studied, and diagnostic criteria used.  
38  
39  
40  
41  
42  
43  
44  
45  
46  
47  
48  
49  
50  
51  
52  
53  
54  
55  
56  
57  
58  
59  
60

## Declarations

### Author Contribution

The idea was conceptualized by M.A.R.S. The literature review was performed by S.U.H. and M.A.R.S. S.U.H. wrote the first of the paper. Both authors approve of the final version of the article.

### Funding Statement

This research received no specific grant from any funding agency in the public, commercial or not-for-profit sectors.

### Competing Interests

The authors declare that they have no competing interests.

## References

1. American Diabetes Association. Diagnosis and classification of diabetes mellitus. *Diabetes Care*. 2010;33 Suppl 1(Suppl 1):S62-9.
2. Wild S, Roglic G, Green A, Sicree R, King H. Global prevalence of diabetes: estimates for the year 2000 and projections for 2030. *Diabetes Care*. 2004;27(5):1047-53.
3. King H, Aubert RE, Herman WH. Global burden of diabetes, 1995-2025: prevalence, numerical estimates, and projections. *Diabetes Care*. 1998;21(9):1414-31.
4. Rivera M. Countries with The Largest Population in 2023: The Race to the Top: *SOUTHWEST Journal*; [Available from: <https://www.southwestjournal.com/countries-with-the-largest-population/>].
5. Diabetes in Pakistan (2021): International Diabetes Federation (IDF); [Available from: <https://idf.org/our-network/regions-and-members/middle-east-and-north-africa/members/pakistan/>].
6. Organization WH. "Noncommunicable diseases Pakistan 2018 country profile" 2018 [Available from: [https://cdn.who.int/media/docs/default-source/country-profiles/ncds/pak\\_en.pdf?sfvrsn=365b2b11\\_39&download=true](https://cdn.who.int/media/docs/default-source/country-profiles/ncds/pak_en.pdf?sfvrsn=365b2b11_39&download=true)].
7. McKeigue PM, Shah B, Marmot MG. Relation of central obesity and insulin resistance with high diabetes prevalence and cardiovascular risk in South Asians. *Lancet*. 1991;337(8738):382-6.
8. Iqbal N. The burden of type 2 diabetes: strategies to prevent or delay onset. *Vasc Health Risk Manag*. 2007;3(4):511-20.
9. Shera AS, Jawad F, Maqsood A. Prevalence of diabetes in Pakistan. *Diabetes Res Clin Pract*. 2007;76(2):219-22.
10. Rashid M Ansari JBD, Jan Coles. Type 2 diabetes: Challenges to health care system of Pakistan. *International Journal of Diabetes Research*. 2015;4(1):7-12.
11. Rafique G, Azam SI, White F. Diabetes knowledge, beliefs and practices among people with diabetes attending a university hospital in Karachi, Pakistan. *East Mediterr Health J*. 2006;12(5):590-8.
12. Basit A, Tanveer S, Fawwad A, Naeem N. Prevalence and contributing risk factors for hypertension in urban and rural areas of Pakistan; a study from second National Diabetes Survey of Pakistan (NDSP) 2016-2017. *Clin Exp Hypertens*. 2020;42(3):218-24.
13. Abuelmagd W, Håkonsen H, Mahmood KQ, Taghizadeh N, Toverud EL. Living with Diabetes: Personal Interviews with Pakistani Women in Norway. *J Immigr Minor Health*. 2018;20(4):848-53.
14. Ansari RM, Hosseinzadeh H, Harris M, Zwar N. Self-management experiences among middle-aged population of rural area of Pakistan with type 2 diabetes: A qualitative analysis. *Clinical Epidemiology and Global Health*. 2019;7(2):177-83.

15. Hippisley-Cox J, Coupland C. Diabetes treatments and risk of amputation, blindness, severe kidney failure, hyperglycaemia, and hypoglycaemia: open cohort study in primary care. *Bmj*. 2016;352:i1450.
16. Meo SA, Zia I, Bukhari IA, Arain SA. Type 2 diabetes mellitus in Pakistan: Current prevalence and future forecast. *J Pak Med Assoc*. 2016;66(12):1637-42.
17. Akhtar S, Nasir JA, Abbas T, Sarwar A. Diabetes in Pakistan: A systematic review and meta-analysis. *Pak J Med Sci*. 2019;35(4):1173-8.
18. Shamseer L, Moher D, Clarke M, Ghersi D, Liberati A, Petticrew M, et al. Preferred reporting items for systematic review and meta-analysis protocols (PRISMA-P) 2015: elaboration and explanation. *Bmj*. 2015;350:g7647.
19. Page MJ, McKenzie JE, Bossuyt PM, Boutron I, Hoffmann TC, Mulrow CD, et al. The PRISMA 2020 statement: an updated guideline for reporting systematic reviews. *Bmj*. 2021;372:n71.
20. Hasan SU, Siddiqui MAR. Epidemiology of Diabetes Mellitus in Pakistan: A Systematic Review Protocol: PROSPERO; 2023 [Available from: [https://www.crd.york.ac.uk/PROSPERO/display\\_record.php?RecordID=453085](https://www.crd.york.ac.uk/PROSPERO/display_record.php?RecordID=453085)].
21. Organization WH. "Definition and diagnosis of diabetes mellitus and intermediate hyperglycaemia: report of a WHO/IDF consultation" 2006 [Available from: <https://www.who.int/publications/i/item/definition-and-diagnosis-of-diabetes-mellitus-and-intermediate-hyperglycaemia>].
22. Munn Z, Moola S, Riitano D, Lisy K. The development of a critical appraisal tool for use in systematic reviews addressing questions of prevalence. *Int J Health Policy Manag*. 2014;3(3):123-8.
23. GDT G. "GRADEpro Guideline Development Tool [Software]": McMaster University and Evidence Prime; 2022 [Available from: [grade.pro](http://grade.pro)].
24. Mehboob B, Safdar NF, Zaheer S. Socio-economic, environmental and demographic determinants of rise in obesity among Pakistani women: a systematic review. *J Pak Med Assoc*. 2016;66(9):1165-72.
25. Meo SA, Zia I, Bukhari IA, Arain SA. Type 2 diabetes mellitus in Pakistan: Current prevalence and future forecast. *J Pak Med Assoc*. 2016;66(12):1637-42.
26. Association AD. Diagnosis and classification of diabetes mellitus. *Diabetes care*. 2010;33(Supplement\_1):S62-S9.

| Electronic database | Search string                                                                                                                                                                                                                                                                                                                                                                                                                                           |
|---------------------|---------------------------------------------------------------------------------------------------------------------------------------------------------------------------------------------------------------------------------------------------------------------------------------------------------------------------------------------------------------------------------------------------------------------------------------------------------|
| PubMed              | (Diabetes OR Diabetes mellitus OR HbA1c OR fasting glucose OR glucose intolerance OR Type 2 diabetes OR Gestational diabetes OR Diabetic OR Pre-diabetes OR pre diabetes) AND (Prevalence OR Epidemiology OR Incidence OR survey) AND (Pakistan OR Pakistani OR gilgit OR kashmir OR sindh OR punjab OR baluchistan OR khyber pakhtunkhwa OR North West Frontier Province)                                                                              |
| PakMediNet          | (Diabetes OR Diabetes mellitus OR HbA1c OR fasting glucose OR glucose intolerance OR Type 2 diabetes OR Gestational diabetes OR Diabetic OR Pre-diabetes OR pre diabetes) AND (Prevalence OR Epidemiology OR Incidence OR survey) AND (Pakistan OR Pakistani OR gilgit OR kashmir OR sindh OR punjab OR baluchistan OR khyber pakhtunkhwa OR North West Frontier Province)                                                                              |
| Scopus              | ( ( diabetes OR diabetes AND mellitus OR hba1c OR HbA1c OR fasting AND glucose OR glucose AND intolerance OR type 2 diabetes OR gestational AND diabetes OR diabetic OR pre-diabetes OR pre AND diabetes) AND ( prevalence OR epidemiology OR incidence OR survey ) AND ( Pakistan or Pakistani OR Gilgit OR Kashmir OR Sindh OR Sind OR Punjab OR Balochistan OR Baluchistan OR Khyber AND Pakhtunkhwa OR North AND West AND Frontier AND province ) ) |
| Cochrane            | ( ( diabetes OR diabetes AND mellitus OR hba1c OR HbA1c OR fasting AND glucose OR glucose AND intolerance OR type 2 diabetes OR gestational AND diabetes OR diabetic OR pre-diabetes OR pre AND diabetes) AND ( prevalence OR epidemiology OR incidence OR survey ) AND ( Pakistan or Pakistani OR Gilgit OR Kashmir OR Sindh OR Sind OR Punjab OR Balochistan OR Baluchistan OR Khyber AND Pakhtunkhwa OR North AND West AND Frontier AND province ) ) |
| CINAHL              | ( ( diabetes OR diabetes AND mellitus OR hba1c OR HbA1c OR fasting AND glucose OR glucose AND intolerance OR type 2 diabetes OR gestational AND diabetes OR diabetic OR pre-diabetes OR pre AND diabetes) AND ( prevalence OR epidemiology OR incidence OR survey ) AND ( Pakistan or Pakistani OR Gilgit OR Kashmir OR Sindh OR Sind OR Punjab OR Balochistan OR Baluchistan OR Khyber AND Pakhtunkhwa OR North AND West AND Frontier AND province ) ) |

# Reporting checklist for protocol of a systematic review and meta analysis.

Based on the PRISMA-P guidelines.

## Instructions to authors

Complete this checklist by entering the page numbers from your manuscript where readers will find each of the items listed below.

Your article may not currently address all the items on the checklist. Please modify your text to include the missing information. If you are certain that an item does not apply, please write "n/a" and provide a short explanation.

Upload your completed checklist as an extra file when you submit to a journal.

In your methods section, say that you used the PRISMA-Reporting guidelines, and cite them as:

Moher D, Shamseer L, Clarke M, Ghersi D, Liberati A, Petticrew M, Shekelle P, Stewart LA. Preferred Reporting Items for Systematic Review and Meta-Analysis Protocols (PRISMA-P) 2015 statement. *Syst Rev.* 2015;4(1):1.

|                     |                     | Reporting Item                                                                                                                            | Page Number |
|---------------------|---------------------|-------------------------------------------------------------------------------------------------------------------------------------------|-------------|
| <b>Title</b>        |                     |                                                                                                                                           |             |
| Identification      | <a href="#">#1a</a> | Identify the report as a protocol of a systematic review                                                                                  | 1           |
| Update              | <a href="#">#1b</a> | If the protocol is for an update of a previous systematic review, identify as such                                                        | NA          |
| <b>Registration</b> |                     |                                                                                                                                           |             |
|                     | <a href="#">#2</a>  | If registered, provide the name of the registry (such as PROSPERO) and registration number                                                | 2           |
| <b>Authors</b>      |                     |                                                                                                                                           |             |
| Contact             | <a href="#">#3a</a> | Provide name, institutional affiliation, e-mail address of all protocol authors; provide physical mailing address of corresponding author | 1           |
| Contribution        | <a href="#">#3b</a> | Describe contributions of protocol authors and identify the guarantor of the review                                                       | 14          |



## Amendments

|  |                    |                                                                                                                                                                                                 |    |
|--|--------------------|-------------------------------------------------------------------------------------------------------------------------------------------------------------------------------------------------|----|
|  | <a href="#">#4</a> | If the protocol represents an amendment of a previously completed or published protocol, identify as such and list changes; otherwise, state plan for documenting important protocol amendments | NA |
|--|--------------------|-------------------------------------------------------------------------------------------------------------------------------------------------------------------------------------------------|----|

## Support

|                           |                     |                                                                                                      |    |
|---------------------------|---------------------|------------------------------------------------------------------------------------------------------|----|
| Sources                   | <a href="#">#5a</a> | Indicate sources of financial or other support for the review                                        | 14 |
| Sponsor                   | <a href="#">#5b</a> | Provide name for the review funder and / or sponsor                                                  | 14 |
| Role of sponsor or funder | <a href="#">#5c</a> | Describe roles of funder(s), sponsor(s), and / or institution(s), if any, in developing the protocol | 14 |

## Introduction

|            |                    |                                                                                                                                                          |      |
|------------|--------------------|----------------------------------------------------------------------------------------------------------------------------------------------------------|------|
| Rationale  | <a href="#">#6</a> | Describe the rationale for the review in the context of what is already known                                                                            | 4, 5 |
| Objectives | <a href="#">#7</a> | Provide an explicit statement of the question(s) the review will address with reference to participants, interventions, comparators, and outcomes (PICO) | 5, 6 |

## Methods

|                                   |                      |                                                                                                                                                                                                                               |    |
|-----------------------------------|----------------------|-------------------------------------------------------------------------------------------------------------------------------------------------------------------------------------------------------------------------------|----|
| Eligibility criteria              | <a href="#">#8</a>   | Specify the study characteristics (such as PICO, study design, setting, time frame) and report characteristics (such as years considered, language, publication status) to be used as criteria for eligibility for the review | 7  |
| Information sources               | <a href="#">#9</a>   | Describe all intended information sources (such as electronic databases, contact with study authors, trial registers or other grey literature sources) with planned dates of coverage                                         | 9  |
| Search strategy                   | <a href="#">#10</a>  | Present draft of search strategy to be used for at least one electronic database, including planned limits, such that it could be repeated                                                                                    | NA |
| Study records - data management   | <a href="#">#11a</a> | Describe the mechanism(s) that will be used to manage records and data throughout the review                                                                                                                                  | NA |
| Study records - selection process | <a href="#">#11b</a> | State the process that will be used for selecting studies (such as two independent reviewers) through each phase of the review (that is, screening, eligibility and inclusion in meta-analysis)                               | 9  |
| Study records - data              | <a href="#">#11c</a> | Describe planned method of extracting data from reports (such as                                                                                                                                                              | 9  |

|    |                    |                      |                                                                           |       |
|----|--------------------|----------------------|---------------------------------------------------------------------------|-------|
| 1  | collection process |                      | piloting forms, done independently, in duplicate), any processes for      |       |
| 2  |                    |                      | obtaining and confirming data from investigators                          |       |
| 3  |                    |                      |                                                                           |       |
| 4  | Data items         | <a href="#">#12</a>  | List and define all variables for which data will be sought (such as      | 9     |
| 5  |                    |                      | PICO items, funding sources), any pre-planned data assumptions and        |       |
| 6  |                    |                      | simplifications                                                           |       |
| 7  |                    |                      |                                                                           |       |
| 8  |                    |                      |                                                                           |       |
| 9  | Outcomes and       | <a href="#">#13</a>  | List and define all outcomes for which data will be sought, including     | 8, 9  |
| 10 | prioritization     |                      | prioritization of main and additional outcomes, with rationale            |       |
| 11 |                    |                      |                                                                           |       |
| 12 |                    |                      |                                                                           |       |
| 13 | Risk of bias in    | <a href="#">#14</a>  | Describe anticipated methods for assessing risk of bias of individual     | 9, 10 |
| 14 | individual studies |                      | studies, including whether this will be done at the outcome or study      |       |
| 15 |                    |                      | level, or both; state how this information will be used in data synthesis |       |
| 16 |                    |                      |                                                                           |       |
| 17 |                    |                      |                                                                           |       |
| 18 | Data synthesis     | <a href="#">#15a</a> | Describe criteria under which study data will be quantitatively           | 10    |
| 19 |                    |                      | synthesised                                                               |       |
| 20 |                    |                      |                                                                           |       |
| 21 |                    |                      |                                                                           |       |
| 22 | Data synthesis     | <a href="#">#15b</a> | If data are appropriate for quantitative synthesis, describe planned      | 10    |
| 23 |                    |                      | summary measures, methods of handling data and methods of                 |       |
| 24 |                    |                      | combining data from studies, including any planned exploration of         |       |
| 25 |                    |                      | consistency (such as I <sup>2</sup> , Kendall's $\tau$ )                  |       |
| 26 |                    |                      |                                                                           |       |
| 27 |                    |                      |                                                                           |       |
| 28 |                    |                      |                                                                           |       |
| 29 | Data synthesis     | <a href="#">#15c</a> | Describe any proposed additional analyses (such as sensitivity or         | 10    |
| 30 |                    |                      | subgroup analyses, meta-regression)                                       |       |
| 31 |                    |                      |                                                                           |       |
| 32 |                    |                      |                                                                           |       |
| 33 | Data synthesis     | <a href="#">#15d</a> | If quantitative synthesis is not appropriate, describe the type of        | 10    |
| 34 |                    |                      | summary planned                                                           |       |
| 35 |                    |                      |                                                                           |       |
| 36 |                    |                      |                                                                           |       |
| 37 | Meta-bias(es)      | <a href="#">#16</a>  | Specify any planned assessment of meta-bias(es) (such as publication      | 11    |
| 38 |                    |                      | bias across studies, selective reporting within studies)                  |       |
| 39 |                    |                      |                                                                           |       |
| 40 |                    |                      |                                                                           |       |
| 41 | Confidence in      | <a href="#">#17</a>  | Describe how the strength of the body of evidence will be assessed        | 9     |
| 42 | cumulative         |                      | (such as GRADE)                                                           |       |
| 43 | evidence           |                      |                                                                           |       |
| 44 |                    |                      |                                                                           |       |
| 45 |                    |                      |                                                                           |       |

46 The PRISMA-P elaboration and explanation paper is distributed under the terms of the Creative Commons  
 47 Attribution License CC-BY. This checklist was completed on 01. September 2023 using  
 48 <https://www.goodreports.org/>, a tool made by the [EQUATOR Network](#) in collaboration with [Penelope.ai](#)  
 49

# BMJ Open

## Epidemiology of Diabetes Mellitus in Pakistan: A Systematic Review Protocol

|                                 |                                                                                                                                                                                                |
|---------------------------------|------------------------------------------------------------------------------------------------------------------------------------------------------------------------------------------------|
| Journal:                        | <i>BMJ Open</i>                                                                                                                                                                                |
| Manuscript ID                   | bmjopen-2023-079513.R2                                                                                                                                                                         |
| Article Type:                   | Protocol                                                                                                                                                                                       |
| Date Submitted by the Author:   | 26-Feb-2024                                                                                                                                                                                    |
| Complete List of Authors:       | Hasan, Syed Umar; The Aga Khan University, Department of Ophthalmology and Visual Sciences<br>Siddiqui, M. A. Rehman; The Aga Khan University, Department of Ophthalmology and Visual Sciences |
| <b>Primary Subject Heading</b>: | Diabetes and endocrinology                                                                                                                                                                     |
| Secondary Subject Heading:      | Epidemiology                                                                                                                                                                                   |
| Keywords:                       | DIABETES & ENDOCRINOLOGY, EPIDEMIOLOGIC STUDIES, Meta-Analysis                                                                                                                                 |
|                                 |                                                                                                                                                                                                |

SCHOLARONE™  
Manuscripts

# Epidemiology of Diabetes Mellitus in Pakistan: A Systematic Review Protocol

S. Umar Hasan<sup>1</sup>, M. A. Rehman Siddiqui<sup>1</sup>

<sup>1</sup> Department of Ophthalmology and Visual Sciences,  
Aga Khan University Hospital,  
National Stadium Road, P.O. Box 3500  
Karachi, 74800  
Pakistan

**Corresponding Author:** M. A. Rehman Siddiqui

Department of Ophthalmology and Visual Sciences,  
Aga Khan University Hospital,  
National Stadium Road, P.O. Box 3500  
Karachi, 74800  
Pakistan

Email: [rehman.siddiqui@gmail.com](mailto:rehman.siddiqui@gmail.com)

## Abstract

### Introduction

Diabetes Mellitus (DM) is a chronic metabolic disorder characterized by hyperglycemia resulting from defects in insulin secretion, insulin action, or both. As a major global health concern, its prevalence has been steadily increasing. Pakistan, is no exception to this trend, facing a growing burden of non-communicable diseases (NCDs) including DM. This research aims to comprehensively assess the prevalence of DM, disparities between rural and urban populations as well as between males and females in Pakistan.

### Methods and analysis

The systematic review will follow PRISMA guidelines and will aim to assess DM prevalence in Pakistan. A comprehensive search strategy will be applied to databases like PubMed, Scopus, Cochrane, PakMediNet, and CINAHL from inception up to August 1st, 2023. We will include studies that focus on diabetes prevalence in the general population, employing WHO or ADA criteria of diagnosis of DM. Cross-sectional studies, cohort studies, and population-based surveys with a sample size  $\geq 500$ , in English will be considered. Data extraction will be done as per a predefined proforma which will include study details such as demographics, prevalence data, and methodology. A meta-analysis will be performed using random effect model with inverse variance weighted method. I-square statistics will be used to examine heterogeneity, and subgroups analyses will be performed.

### Ethics and dissemination

The findings from the systematic review will be shared by publishing them in a peer-reviewed journal and showcasing them at a pertinent conference. Our analysis will be based on aggregated data and will not involve individual patient information, thus eliminating the need for ethical clearance.

**Keywords:** Diabetes, DM, Prevalence, Epidemiology, Pakistan

**Trial registration number:** PROSPERO CRD42023453085.

**Word count:** 2791

### Strengths and limitations of the study

- Adheres to PRISMA guidelines for systematic reviews and implements a meticulous systematic data extraction process, contributing to the overall comprehensiveness of the review.
- Conducts a comprehensive literature search covering studies published until August 1st, 2023, bolstering the review's reliability.
- Encompasses a wide range of studies by employing both World Health Organization and American Diabetes Association criteria for diagnosing Diabetes Mellitus, thus enhancing the review's external validity.
- Potential for publication bias due to reliance on published studies, which may favor positive or statistically significant results.
- Variations in prevalence estimates across included studies due to differences in study methodologies, studied populations, and diagnostic criteria used.

## 1. Introduction

Diabetes Mellitus (DM) is a chronic metabolic disorder characterized by hyperglycemia resulting from defects in insulin secretion, insulin action, or both (1). It is a major global health concern, with its prevalence steadily increasing in both developed and developing countries (2). Pakistan, as a populous South Asian nation, is no exception to this trend. The country is facing a growing burden of non-communicable diseases (NCDs), and DM has emerged as a significant public health challenge over the past few decades (3).

### 1.1. Pakistani context

#### **Epidemiological Overview:**

Pakistan, as the world's fifth most populous country, faces numerous health challenges, including the rise of NCDs (4). Among these NCDs, DM stands out as a significant health concern due to its increasing prevalence and associated health and economic burdens. According to estimates, Pakistan had approximately 5.2 million adults living with diabetes in 2000 (2), and this number amplified to approximately 32,964,500 in 2021 (5). The World Health Organization (WHO) estimated that in 2016 NCDs accounted for 58% of all deaths in Pakistan (6). The four most prevalent NCDs in Pakistan in 2016 were cardiovascular diseases, cancers, chronic respiratory diseases and diabetes (6). In 2016, it was reported that the total number of deaths directly caused by diabetes were estimated to be 3% (6). However, diabetes also played a significant role in mortality as a risk factor for other NCDs such as cardiovascular diseases and hypertension.

#### **Factors Contributing to the Diabetes Burden:**

Rapid urbanization and shifts in lifestyle patterns have transformed dietary habits, physical activity levels, and overall health behaviors in Pakistan (7). Traditional diets have been replaced by more calorie-dense and processed food options, leading to an increase in obesity rates and other risk factors associated with diabetes (8, 9). Additionally, sedentary occupations, increased usage of technology, and reduced physical activity levels have become prevalent, especially in urban areas. This lifestyle shift has contributed to an increased risk of obesity and diabetes. Pakistan's healthcare system faces several challenges, including limited resources, inadequate healthcare infrastructure, and uneven distribution of medical facilities (10). This can impact early detection,

1  
2  
3 diagnosis, and management of diabetes, particularly in rural and underserved areas. Lack of  
4 awareness and education about diabetes and its risk factors can lead to delayed diagnosis and poor  
5 management (11). Promoting diabetes awareness campaigns and educational programs is crucial  
6 to encourage early detection and effective management of the disease. The prevalence of diabetes  
7 in Pakistan exhibits variations across different age groups and genders (12). Age is a well-  
8 established risk factor for diabetes, and the disease tends to increase with advancing age (12).  
9 Moreover, studies have shown that women in Pakistan may face additional challenges related to  
10 diabetes, such as limited access to healthcare, cultural norms impacting their dietary choices, and  
11 lack of autonomy in healthcare decisions (13, 14). Lastly, diabetes poses a substantial health  
12 burden in Pakistan, with complications such as cardiovascular diseases, kidney failure, blindness,  
13 and lower limb amputations being common (15). These complications not only affect the quality  
14 of life of individuals but also exert significant economic pressure on families and the healthcare  
15 system.  
16  
17  
18  
19  
20  
21  
22  
23  
24  
25  
26

## 27 **1.2. Rural vs Urban population**

28  
29 Pakistan's population is characterized by a diverse mix of urban and rural inhabitants. While urban  
30 centers experience higher levels of industrialization, better access to healthcare facilities, and  
31 potentially greater exposure to risk factors associated with DM, the rural population often faces  
32 unique challenges in terms of access to healthcare, education, and awareness about non-  
33 communicable diseases. These disparities between rural and urban areas could influence the  
34 prevalence and management of DM across different regions in Pakistan (9, 16).  
35  
36  
37  
38  
39  
40

41 Understanding the potential differences in DM prevalence between rural and urban populations is  
42 crucial for designing targeted interventions that consider the specific needs and challenges faced  
43 by each group. It can also inform healthcare policymakers and practitioners about the allocation  
44 of resources and the implementation of preventive measures tailored to the characteristics of  
45 distinct population segments.  
46  
47  
48  
49  
50

## 51 **1.3. Objectives**

52  
53 The primary objective of this systematic review is to provide a comprehensive assessment of the  
54 prevalence of Diabetes Mellitus in Pakistan. Specifically, the review aims to:  
55  
56  
57  
58  
59  
60



- Determine the overall prevalence of DM in the general population of Pakistan.
- Explore variations in DM prevalence based on factors such as age, gender, and geographical location (e.g., provinces, urban vs. rural areas).
- Identify potential temporal trends in DM prevalence over the study period if sufficient data are available.
- Assess the quality of the studies included in the review to ensure robustness and reliability of the findings.

By synthesizing existing data from diverse sources, this systematic review will contribute to the current understanding of the burden of DM in Pakistan. The findings will be valuable for policymakers, healthcare professionals, and stakeholders in shaping evidence-based strategies for the prevention, management, and control of DM in the country. Furthermore, the review will help identify research gaps and areas requiring further investigation, ultimately supporting evidence-informed decision-making in public health and healthcare policies related to DM in Pakistan.

The seminal work by Akhtar et al. (17) diligently outlined the prevalence of diabetes and prediabetes across Pakistan. However, the landscape of diabetes epidemiology is dynamic, marked by evolving trends and nuanced demographic variations that necessitate a comprehensive reevaluation. This current study seeks to diverge from Akhtar et al.'s (17) singular focus on prevalence by undertaking a longitudinal exploration of the shifting prevalence rates of diabetes over time. Moreover, it aims to dissect gender-based and regional based disparities by meticulously analyzing the prevalence of diabetes and prediabetes in both males and females, dissecting potential variations that might exist between these cohorts.

## 2. Methods and analysis

### 2.1. Study design

This is a protocol paper designed for a systematic review that is reported following the Preferred Reporting Items for Systematic Reviews and Meta-Analyses extension for protocol papers (PRISMA-P) (18). The systematic review that follows will also adhere to the PRISMA guidelines (19). The review will be conducted using a rigorous and transparent methodology to ensure the systematic and unbiased synthesis of evidence related to the prevalence of Diabetes Mellitus in Pakistan. The study is registered with PROSPERO (registration number: CRD42023453085) (20).

### 2.2. Selection criteria

#### 2.2.1. Inclusion criteria

The systematic review will encompass studies published from inception up to August 1st, 2023. The primary population of interest will comprise individuals residing in Pakistan, with no restrictions based on age, gender, or ethnicity. Studies conducted in various centers, both regional and national, to ensure a comprehensive representation of the prevalence of Diabetes Mellitus in Pakistan. The review will encompass research that features both patients previously diagnosed with DM as well as those newly diagnosed. The criteria for new cases in these studies should adhere to either the WHO guidelines or the American Diabetes Association (ADA) criteria for diagnosing DM (1, 21). The study designs to be included are cross-sectional studies, cohort studies, and population-based surveys. To ensure language homogeneity and accessibility of data, only studies published in the English language will be considered for inclusion in the systematic review.

#### 2.2.2. Exclusion criteria

Studies with a sample size less than 500 will be excluded due to their potential impact on the reliability of prevalence estimates. Studies focusing solely on gestational diabetes or diabetes in specific subpopulations (e.g., diabetic patients with specific comorbidities) will be excluded. Studies that rely solely on self-reported diabetes, that is where the diagnosis of DM is based on data reported by the patient instead of using an authentic diagnostic method (blood testing as defined by WHO or ADA) will be excluded.

### 2.3. Diagnostic criteria

The ADA criteria for the diagnosis of DM comprise of 4 potential criteria.

- i. Glycated hemoglobin (HbA1c)  $\geq 6.5\%$ . The test should be performed in a laboratory using a method that is National Glycohemoglobin Standardization Program (NGSP) certified and standardized to the Diabetes Control and Complications Trial (DCCT) assay. In the absence of unequivocal hyperglycemia, diagnosis requires two abnormal test results from the same sample or in two separate test samples.
- ii. Fasting plasma glucose (FPG)  $\geq 126$  mg/dL (7 mmol/L). Fasting is defined as no caloric intake for at least 8 hours. In the absence of unequivocal hyperglycemia, diagnosis requires two abnormal test results from the same sample or in two separate test samples.
- iii. 2-hour plasma glucose  $\geq 200$  mg/dL (11.1 mmol/L) during an oral glucose tolerance test (OGTT). The test should be performed as described by the World Health Organization, using a glucose load containing the equivalent of 75 g anhydrous glucose dissolved in water. In the absence of unequivocal hyperglycemia, diagnosis requires two abnormal test results from the same sample or in two separate test samples.
- iv. In a patient with classic symptoms of hyperglycemia or hyperglycemic crisis, a random plasma glucose  $\geq 200$  mg/dL (11.1 mmol/L).

The WHO criteria for the diagnosis of DM comprise of 5 potential criteria.

- i. Fasting (Overnight fast of 8–14 hours) venous or capillary plasma glucose  $\geq 7.0$  mmol/L (126 mg/dL).
- ii. 2-hour post-load venous plasma glucose  $\geq 11.1$  mmol/L (200 mg/dL)
- iii. 2-hour post-load capillary plasma glucose  $\geq 12.2$  mmol/L (220 mg/dL)
- iv. Random plasma glucose  $\geq 11.1$  mmol/L (200 mg/dL). To be used only in the presence of symptoms.
- v. HbA1c  $\geq 6.5\%$  (48 mmol/mol).

### 2.4. Outcomes

The primary outcome of interest for this systematic review is the prevalence of DM in Pakistan.

The prevalence will be expressed as a proportion expressed as percentage of the total population

assessed in each study. Additionally, the study will also look into potential confounders associated with diabetes (e.g., hypertension, family history and obesity) where possible.

## 2.5. Search strategy

Literature review will be carried out by two independent reviewers in the following electronic databases PubMed, Scopus, Cochrane, PakMediNet and CINAHL. The search strategy will combine relevant keywords using the Boolean operators (OR and AND) including “diabetes”, “diabetics”, “DM”, “diabetes Mellitus”, “T2DM”, “prevalence”, and “Pakistan”, “Sind”, “Punjab”, “NWFP”, “Khyber Pakhtunkhwa”, and “Baluchistan”. (Supplementary material) The selection process for the articles will follow the PRISMA guidelines.

## 2.6. Data extraction

Data extraction will be conducted independently by two reviewers using a predefined data extraction form. The extracted data will include the following information:

- Study characteristics: author(s), year of publication, study design, and sample size.
- Population characteristics: age, gender, and location of study participants.
- Risk factors: number of patients with hypertension, family history, overweight, obesity, dyslipidemia, current cigarette smoking status, and cardiovascular disorder
- Prevalence data: number of individuals with diabetes, number of patients with prediabetes, total sample size, and prevalence.
- Methodological details: diagnostic criteria used for diabetes, data collection methods, and study limitations.

## 2.7. Quality assessment

The quality and risk of bias of included studies will be assessed using appropriate tools. Joanna Briggs Institute critical appraisal checklist for studies reporting prevalence data will be utilized for cohort and cross-sectional studies to evaluate the quality of the selected studies (22). The Grading of Recommendations, Assessment, Development, and Evaluation (GRADE) tool will be used to assess the certainty of evidence and this evaluation will be conducted by two independent reviewers (23).

## 2.8. Data analysis

### 2.7.1. Descriptive Analysis

Initially, a descriptive analysis will be conducted to present an overview of the characteristics of the included studies. This analysis will involve summarizing the study designs, sample sizes, age groups, gender distribution, geographical locations, and prevalence rates reported in each study. The data will be tabulated and presented in a narrative format to provide a comprehensive understanding of the studies included in the review.

### 2.7.2. Prevalence Synthesis

The primary objective of the systematic review is to estimate the prevalence of Diabetes Mellitus in Pakistan. To achieve this, a meta-analysis will be performed. The meta-analysis aims to pool the prevalence estimates from individual studies to generate an overall summary estimate of diabetes prevalence in the country using the inverse variance-weighted method. Before conducting the meta-analysis, heterogeneity among the included studies will be assessed using the  $I^2$  statistic. Heterogeneity measures the degree of variability in effect sizes (prevalence estimates) across studies. If substantial heterogeneity is identified ( $I^2 > 50\%$ ), a random-effects model will be employed, considering the assumption that the true effect sizes may vary between studies due to differences in study populations, settings, and methodologies. The meta-analysis results will be visually represented using a forest plot, where each study's prevalence estimate, and its corresponding confidence interval will be plotted. The overall prevalence and the 95% confidence interval will be presented. If a considerable level of heterogeneity is observed, subgroup analyses will be conducted to explore potential sources of variability. Subgroups based on factors such as age groups, gender, and geographical locations (e.g., provinces, rural vs. urban areas) will be considered to assess whether prevalence estimates differ significantly between these subgroups. Additionally, to assess the temporal trends, studies will be divided into different groups based on the year the WHO criteria was updated for the diagnosis of DM. Sensitivity analyses will be performed to examine the robustness of the results. This involves repeating the meta-analysis after excluding studies with a high risk of bias or those with small sample sizes to assess the impact of

1  
2  
3 individual studies on the overall prevalence. Potential publication bias, which refers to the  
4 tendency for published studies to be biased towards significant or positive findings, will be  
5 assessed using funnel plots.  
6  
7  
8  
9

### 10 3. **Patient and Public Involvement**

11 No patient will be involved.  
12  
13  
14

### 15 4. **Ethics and Dissemination**

16 The findings from the systematic review will be shared by publishing them in a peer-reviewed  
17 journal and showcasing them at a pertinent conference. Our analysis will be based on aggregated  
18 data and will not involve individual patient information, thus eliminating the need for ethical  
19 clearance.  
20  
21  
22  
23  
24  
25  
26  
27  
28  
29  
30  
31  
32  
33  
34  
35  
36  
37  
38  
39  
40  
41  
42  
43  
44  
45  
46  
47  
48  
49  
50  
51  
52  
53  
54  
55  
56  
57  
58  
59  
60

## 5. Discussion

The findings of this systematic review will hold significant implications for our understanding of the prevalence of DM in Pakistan and its multifaceted impact on public health. The comprehensive synthesis of available data will provide insights into the burden of DM across different segments of the population and geographical regions. This discussion section highlights the strengths and limitations of the review, and explores the broader implications for healthcare policies, clinical practice, and future research.

The prevalence estimates synthesized in this review will reflect the dynamic nature of DM in Pakistan's population. The documented variations in prevalence based on age, gender, and geographical regions align with the complex interplay of genetic, lifestyle, and socio-economic factors. It is noteworthy that the increasing prevalence of DM in Pakistan mirrors global trends in urbanization, sedentary lifestyles, and dietary shifts, indicating the need for targeted interventions (24).

Comparing the prevalence rates as a result of this review with previous estimates can offer insights into the temporal trends of DM in Pakistan (17, 25). Any significant increase in prevalence over time could signal a growing public health concern and emphasize the urgency of addressing DM as a national priority.

The findings of this systematic review will have direct implications for healthcare policy and clinical practice in Pakistan. A clear understanding of DM prevalence is essential for allocating healthcare resources efficiently and designing preventive strategies tailored to specific populations. Identifying high-risk groups, such as older individuals and those residing in urban areas, allows for targeted interventions and early detection efforts.

Furthermore, the prevalence data can inform healthcare providers about the potential patient load and guide clinical decision-making, including risk assessment and management strategies. For policymakers, the findings underscore the importance of a comprehensive national strategy to tackle DM, encompassing awareness campaigns, improved healthcare infrastructure, and promoting healthy lifestyles.

1  
2  
3  
4  
5 This systematic review may help identify several avenues for future research. First, conducting  
6 longitudinal studies could provide insights into the changing prevalence of DM over time and help  
7 identify potential risk factors contributing to its rise. Second, exploring the socio-economic  
8 determinants of DM prevalence and its disparities across different regions can guide equitable  
9 policy formulation. Third, investigating the impact of cultural and lifestyle factors on DM  
10 prevalence among specific subgroups could offer nuanced insights into the disease's epidemiology.  
11  
12  
13  
14  
15  
16

### 17 **5.1. Strengths and Limitations**

18 One of the notable strengths of this systematic review lies in its adherence to the rigorous Preferred  
19 Reporting Items for Systematic Reviews and Meta-Analyses (PRISMA) guidelines (19). The  
20 comprehensive literature search, including studies published up to August 1st, 2023, and the  
21 systematic data extraction process contribute to the reliability and comprehensiveness of the  
22 review. By employing both the World Health Organization (WHO) and American Diabetes  
23 Association (ADA) criteria for diagnosing DM (21, 26), this review encompasses a broad spectrum  
24 of studies, enhancing its external validity.  
25  
26  
27  
28  
29  
30  
31

32 Despite its strengths, this systematic review is not without limitations. The review's dependency  
33 on published studies may introduce publication bias, as studies with positive or statistically  
34 significant results are more likely to be published. The inclusion of studies published in the English  
35 language may lead to language bias, potentially omitting studies in other languages. Furthermore,  
36 the prevalence estimates reported in the included studies may be subject to variations due to  
37 differences in study methodologies, populations studied, and diagnostic criteria used.  
38  
39  
40  
41  
42  
43  
44  
45  
46  
47  
48  
49  
50  
51  
52  
53  
54  
55  
56  
57  
58  
59  
60



## Declarations

### Author Contribution

The idea was conceptualized by M.A.R.S. The literature review was performed by S.U.H. and M.A.R.S. S.U.H. wrote the first of the paper. Both authors approve of the final version of the article.

### Funding Statement

This research received no specific grant from any funding agency in the public, commercial or not-for-profit sectors.

### Competing Interests

The authors declare that they have no competing interests.

## References

1. American Diabetes Association. Diagnosis and classification of diabetes mellitus. *Diabetes Care*. 2010;33 Suppl 1(Suppl 1):S62-9.
2. Wild S, Roglic G, Green A, Sicree R, King H. Global prevalence of diabetes: estimates for the year 2000 and projections for 2030. *Diabetes Care*. 2004;27(5):1047-53.
3. King H, Aubert RE, Herman WH. Global burden of diabetes, 1995-2025: prevalence, numerical estimates, and projections. *Diabetes Care*. 1998;21(9):1414-31.
4. Rivera M. Countries with The Largest Population in 2023: The Race to the Top: *SOUTHWEST Journal*; [Available from: <https://www.southwestjournal.com/countries-with-the-largest-population/>].
5. Diabetes in Pakistan (2021): International Diabetes Federation (IDF); [Available from: <https://idf.org/our-network/regions-and-members/middle-east-and-north-africa/members/pakistan/>].
6. Organization WH. "Noncommunicable diseases Pakistan 2018 country profile" 2018 [Available from: [https://cdn.who.int/media/docs/default-source/country-profiles/ncds/pak\\_en.pdf?sfvrsn=365b2b11\\_39&download=true](https://cdn.who.int/media/docs/default-source/country-profiles/ncds/pak_en.pdf?sfvrsn=365b2b11_39&download=true)].
7. McKeigue PM, Shah B, Marmot MG. Relation of central obesity and insulin resistance with high diabetes prevalence and cardiovascular risk in South Asians. *Lancet*. 1991;337(8738):382-6.
8. Iqbal N. The burden of type 2 diabetes: strategies to prevent or delay onset. *Vasc Health Risk Manag*. 2007;3(4):511-20.
9. Shera AS, Jawad F, Maqsood A. Prevalence of diabetes in Pakistan. *Diabetes Res Clin Pract*. 2007;76(2):219-22.
10. Rashid M Ansari JBD, Jan Coles. Type 2 diabetes: Challenges to health care system of Pakistan. *International Journal of Diabetes Research*. 2015;4(1):7-12.
11. Rafique G, Azam SI, White F. Diabetes knowledge, beliefs and practices among people with diabetes attending a university hospital in Karachi, Pakistan. *East Mediterr Health J*. 2006;12(5):590-8.
12. Basit A, Tanveer S, Fawwad A, Naeem N. Prevalence and contributing risk factors for hypertension in urban and rural areas of Pakistan; a study from second National Diabetes Survey of Pakistan (NDSP) 2016-2017. *Clin Exp Hypertens*. 2020;42(3):218-24.
13. Abuelmagd W, Håkonsen H, Mahmood KQ, Taghizadeh N, Toverud EL. Living with Diabetes: Personal Interviews with Pakistani Women in Norway. *J Immigr Minor Health*. 2018;20(4):848-53.
14. Ansari RM, Hosseinzadeh H, Harris M, Zwar N. Self-management experiences among middle-aged population of rural area of Pakistan with type 2 diabetes: A qualitative analysis. *Clinical Epidemiology and Global Health*. 2019;7(2):177-83.

15. Hippisley-Cox J, Coupland C. Diabetes treatments and risk of amputation, blindness, severe kidney failure, hyperglycaemia, and hypoglycaemia: open cohort study in primary care. *Bmj*. 2016;352:i1450.
16. Meo SA, Zia I, Bukhari IA, Arain SA. Type 2 diabetes mellitus in Pakistan: Current prevalence and future forecast. *J Pak Med Assoc*. 2016;66(12):1637-42.
17. Akhtar S, Nasir JA, Abbas T, Sarwar A. Diabetes in Pakistan: A systematic review and meta-analysis. *Pak J Med Sci*. 2019;35(4):1173-8.
18. Shamseer L, Moher D, Clarke M, Ghersi D, Liberati A, Petticrew M, et al. Preferred reporting items for systematic review and meta-analysis protocols (PRISMA-P) 2015: elaboration and explanation. *Bmj*. 2015;350:g7647.
19. Page MJ, McKenzie JE, Bossuyt PM, Boutron I, Hoffmann TC, Mulrow CD, et al. The PRISMA 2020 statement: an updated guideline for reporting systematic reviews. *Bmj*. 2021;372:n71.
20. Hasan SU, Siddiqui MAR. Epidemiology of Diabetes Mellitus in Pakistan: A Systematic Review Protocol: PROSPERO; 2023 [Available from: [https://www.crd.york.ac.uk/PROSPERO/display\\_record.php?RecordID=453085](https://www.crd.york.ac.uk/PROSPERO/display_record.php?RecordID=453085)].
21. Organization WH. "Definition and diagnosis of diabetes mellitus and intermediate hyperglycaemia: report of a WHO/IDF consultation" 2006 [Available from: <https://www.who.int/publications/i/item/definition-and-diagnosis-of-diabetes-mellitus-and-intermediate-hyperglycaemia>].
22. Munn Z, Moola S, Riitano D, Lisy K. The development of a critical appraisal tool for use in systematic reviews addressing questions of prevalence. *Int J Health Policy Manag*. 2014;3(3):123-8.
23. GDT G. "GRADEpro Guideline Development Tool [Software]": McMaster University and Evidence Prime; 2022 [Available from: [grade.pro](http://grade.pro)].
24. Mehboob B, Safdar NF, Zaheer S. Socio-economic, environmental and demographic determinants of rise in obesity among Pakistani women: a systematic review. *J Pak Med Assoc*. 2016;66(9):1165-72.
25. Meo SA, Zia I, Bukhari IA, Arain SA. Type 2 diabetes mellitus in Pakistan: Current prevalence and future forecast. *J Pak Med Assoc*. 2016;66(12):1637-42.
26. Association AD. Diagnosis and classification of diabetes mellitus. *Diabetes care*. 2010;33(Supplement\_1):S62-S9.

| Electronic database | Search string                                                                                                                                                                                                                                                                                                                                                                                                                                           |
|---------------------|---------------------------------------------------------------------------------------------------------------------------------------------------------------------------------------------------------------------------------------------------------------------------------------------------------------------------------------------------------------------------------------------------------------------------------------------------------|
| PubMed              | (Diabetes OR Diabetes mellitus OR HbA1c OR fasting glucose OR glucose intolerance OR Type 2 diabetes OR Gestational diabetes OR Diabetic OR Pre-diabetes OR pre diabetes) AND (Prevalence OR Epidemiology OR Incidence OR survey) AND (Pakistan OR Pakistani OR gilgit OR kashmir OR sindh OR punjab OR baluchistan OR khyber pakhtunkhwa OR North West Frontier Province)                                                                              |
| PakMediNet          | (Diabetes OR Diabetes mellitus OR HbA1c OR fasting glucose OR glucose intolerance OR Type 2 diabetes OR Gestational diabetes OR Diabetic OR Pre-diabetes OR pre diabetes) AND (Prevalence OR Epidemiology OR Incidence OR survey) AND (Pakistan OR Pakistani OR gilgit OR kashmir OR sindh OR punjab OR baluchistan OR khyber pakhtunkhwa OR North West Frontier Province)                                                                              |
| Scopus              | ( ( diabetes OR diabetes AND mellitus OR hba1c OR HbA1c OR fasting AND glucose OR glucose AND intolerance OR type 2 diabetes OR gestational AND diabetes OR diabetic OR pre-diabetes OR pre AND diabetes) AND ( prevalence OR epidemiology OR incidence OR survey ) AND ( Pakistan or Pakistani OR Gilgit OR Kashmir OR Sindh OR Sind OR Punjab OR Balochistan OR Baluchistan OR Khyber AND Pakhtunkhwa OR North AND West AND Frontier AND province ) ) |
| Cochrane            | ( ( diabetes OR diabetes AND mellitus OR hba1c OR HbA1c OR fasting AND glucose OR glucose AND intolerance OR type 2 diabetes OR gestational AND diabetes OR diabetic OR pre-diabetes OR pre AND diabetes) AND ( prevalence OR epidemiology OR incidence OR survey ) AND ( Pakistan or Pakistani OR Gilgit OR Kashmir OR Sindh OR Sind OR Punjab OR Balochistan OR Baluchistan OR Khyber AND Pakhtunkhwa OR North AND West AND Frontier AND province ) ) |
| CINAHL              | ( ( diabetes OR diabetes AND mellitus OR hba1c OR HbA1c OR fasting AND glucose OR glucose AND intolerance OR type 2 diabetes OR gestational AND diabetes OR diabetic OR pre-diabetes OR pre AND diabetes) AND ( prevalence OR epidemiology OR incidence OR survey ) AND ( Pakistan or Pakistani OR Gilgit OR Kashmir OR Sindh OR Sind OR Punjab OR Balochistan OR Baluchistan OR Khyber AND Pakhtunkhwa OR North AND West AND Frontier AND province ) ) |

# Reporting checklist for protocol of a systematic review and meta analysis.

Based on the PRISMA-P guidelines.

## Instructions to authors

Complete this checklist by entering the page numbers from your manuscript where readers will find each of the items listed below.

Your article may not currently address all the items on the checklist. Please modify your text to include the missing information. If you are certain that an item does not apply, please write "n/a" and provide a short explanation.

Upload your completed checklist as an extra file when you submit to a journal.

In your methods section, say that you used the PRISMA-Reporting guidelines, and cite them as:

Moher D, Shamseer L, Clarke M, Ghersi D, Liberati A, Petticrew M, Shekelle P, Stewart LA. Preferred Reporting Items for Systematic Review and Meta-Analysis Protocols (PRISMA-P) 2015 statement. *Syst Rev.* 2015;4(1):1.

| Reporting Item      |                     |                                                                                                                                           | Page Number |
|---------------------|---------------------|-------------------------------------------------------------------------------------------------------------------------------------------|-------------|
| <b>Title</b>        |                     |                                                                                                                                           |             |
| Identification      | <a href="#">#1a</a> | Identify the report as a protocol of a systematic review                                                                                  | 1           |
| Update              | <a href="#">#1b</a> | If the protocol is for an update of a previous systematic review, identify as such                                                        | NA          |
| <b>Registration</b> |                     |                                                                                                                                           |             |
|                     | <a href="#">#2</a>  | If registered, provide the name of the registry (such as PROSPERO) and registration number                                                | 2           |
| <b>Authors</b>      |                     |                                                                                                                                           |             |
| Contact             | <a href="#">#3a</a> | Provide name, institutional affiliation, e-mail address of all protocol authors; provide physical mailing address of corresponding author | 1           |
| Contribution        | <a href="#">#3b</a> | Describe contributions of protocol authors and identify the guarantor of the review                                                       | 14          |

## Amendments

|  |                    |                                                                                                                                                                                                 |    |
|--|--------------------|-------------------------------------------------------------------------------------------------------------------------------------------------------------------------------------------------|----|
|  | <a href="#">#4</a> | If the protocol represents an amendment of a previously completed or published protocol, identify as such and list changes; otherwise, state plan for documenting important protocol amendments | NA |
|--|--------------------|-------------------------------------------------------------------------------------------------------------------------------------------------------------------------------------------------|----|

## Support

|                           |                     |                                                                                                      |    |
|---------------------------|---------------------|------------------------------------------------------------------------------------------------------|----|
| Sources                   | <a href="#">#5a</a> | Indicate sources of financial or other support for the review                                        | 14 |
| Sponsor                   | <a href="#">#5b</a> | Provide name for the review funder and / or sponsor                                                  | 14 |
| Role of sponsor or funder | <a href="#">#5c</a> | Describe roles of funder(s), sponsor(s), and / or institution(s), if any, in developing the protocol | 14 |

## Introduction

|            |                    |                                                                                                                                                          |      |
|------------|--------------------|----------------------------------------------------------------------------------------------------------------------------------------------------------|------|
| Rationale  | <a href="#">#6</a> | Describe the rationale for the review in the context of what is already known                                                                            | 4, 5 |
| Objectives | <a href="#">#7</a> | Provide an explicit statement of the question(s) the review will address with reference to participants, interventions, comparators, and outcomes (PICO) | 5, 6 |

## Methods

|                                   |                      |                                                                                                                                                                                                                               |    |
|-----------------------------------|----------------------|-------------------------------------------------------------------------------------------------------------------------------------------------------------------------------------------------------------------------------|----|
| Eligibility criteria              | <a href="#">#8</a>   | Specify the study characteristics (such as PICO, study design, setting, time frame) and report characteristics (such as years considered, language, publication status) to be used as criteria for eligibility for the review | 7  |
| Information sources               | <a href="#">#9</a>   | Describe all intended information sources (such as electronic databases, contact with study authors, trial registers or other grey literature sources) with planned dates of coverage                                         | 9  |
| Search strategy                   | <a href="#">#10</a>  | Present draft of search strategy to be used for at least one electronic database, including planned limits, such that it could be repeated                                                                                    | NA |
| Study records - data management   | <a href="#">#11a</a> | Describe the mechanism(s) that will be used to manage records and data throughout the review                                                                                                                                  | NA |
| Study records - selection process | <a href="#">#11b</a> | State the process that will be used for selecting studies (such as two independent reviewers) through each phase of the review (that is, screening, eligibility and inclusion in meta-analysis)                               | 9  |
| Study records - data              | <a href="#">#11c</a> | Describe planned method of extracting data from reports (such as                                                                                                                                                              | 9  |

|    |                    |                      |                                                                           |       |
|----|--------------------|----------------------|---------------------------------------------------------------------------|-------|
| 1  | collection process |                      | piloting forms, done independently, in duplicate), any processes for      |       |
| 2  |                    |                      | obtaining and confirming data from investigators                          |       |
| 3  |                    |                      |                                                                           |       |
| 4  | Data items         | <a href="#">#12</a>  | List and define all variables for which data will be sought (such as      | 9     |
| 5  |                    |                      | PICO items, funding sources), any pre-planned data assumptions and        |       |
| 6  |                    |                      | simplifications                                                           |       |
| 7  |                    |                      |                                                                           |       |
| 8  |                    |                      |                                                                           |       |
| 9  | Outcomes and       | <a href="#">#13</a>  | List and define all outcomes for which data will be sought, including     | 8, 9  |
| 10 | prioritization     |                      | prioritization of main and additional outcomes, with rationale            |       |
| 11 |                    |                      |                                                                           |       |
| 12 |                    |                      |                                                                           |       |
| 13 | Risk of bias in    | <a href="#">#14</a>  | Describe anticipated methods for assessing risk of bias of individual     | 9, 10 |
| 14 | individual studies |                      | studies, including whether this will be done at the outcome or study      |       |
| 15 |                    |                      | level, or both; state how this information will be used in data synthesis |       |
| 16 |                    |                      |                                                                           |       |
| 17 |                    |                      |                                                                           |       |
| 18 | Data synthesis     | <a href="#">#15a</a> | Describe criteria under which study data will be quantitatively           | 10    |
| 19 |                    |                      | synthesised                                                               |       |
| 20 |                    |                      |                                                                           |       |
| 21 |                    |                      |                                                                           |       |
| 22 | Data synthesis     | <a href="#">#15b</a> | If data are appropriate for quantitative synthesis, describe planned      | 10    |
| 23 |                    |                      | summary measures, methods of handling data and methods of                 |       |
| 24 |                    |                      | combining data from studies, including any planned exploration of         |       |
| 25 |                    |                      | consistency (such as I <sup>2</sup> , Kendall's $\tau$ )                  |       |
| 26 |                    |                      |                                                                           |       |
| 27 |                    |                      |                                                                           |       |
| 28 |                    |                      |                                                                           |       |
| 29 | Data synthesis     | <a href="#">#15c</a> | Describe any proposed additional analyses (such as sensitivity or         | 10    |
| 30 |                    |                      | subgroup analyses, meta-regression)                                       |       |
| 31 |                    |                      |                                                                           |       |
| 32 |                    |                      |                                                                           |       |
| 33 | Data synthesis     | <a href="#">#15d</a> | If quantitative synthesis is not appropriate, describe the type of        | 10    |
| 34 |                    |                      | summary planned                                                           |       |
| 35 |                    |                      |                                                                           |       |
| 36 |                    |                      |                                                                           |       |
| 37 | Meta-bias(es)      | <a href="#">#16</a>  | Specify any planned assessment of meta-bias(es) (such as publication      | 11    |
| 38 |                    |                      | bias across studies, selective reporting within studies)                  |       |
| 39 |                    |                      |                                                                           |       |
| 40 |                    |                      |                                                                           |       |
| 41 | Confidence in      | <a href="#">#17</a>  | Describe how the strength of the body of evidence will be assessed        | 9     |
| 42 | cumulative         |                      | (such as GRADE)                                                           |       |
| 43 | evidence           |                      |                                                                           |       |
| 44 |                    |                      |                                                                           |       |
| 45 |                    |                      |                                                                           |       |

46 The PRISMA-P elaboration and explanation paper is distributed under the terms of the Creative Commons  
 47 Attribution License CC-BY. This checklist was completed on 01. September 2023 using  
 48 <https://www.goodreports.org/>, a tool made by the [EQUATOR Network](#) in collaboration with [Penelope.ai](#)  
 49
