# Supplementary material for: Epidemiology of diabetes mellitus in Pakistan: a systematic review protocol
Source: PubMed Central journal article supplement — BMJ Open. 2024 Mar 12;14(3):e079513. doi: 10.1136/bmjopen-2023-079513 (PMC10936511; doi:10.1136/bmjopen-2023-079513), 2024-03-12
Supplement: bmjopen-2023-079513supp001.pdf [file bmjopen-2023-079513supp001.pdf]

| Electronic database | Search string                                                                                                                                                                                                                                                                                                                                                                                                                                          |
|---------------------|--------------------------------------------------------------------------------------------------------------------------------------------------------------------------------------------------------------------------------------------------------------------------------------------------------------------------------------------------------------------------------------------------------------------------------------------------------|
| PubMed              | (Diabetes OR Diabetes mellitus OR HbA1c OR fasting glucose OR glucose intolerance OR Type 2 diabetes OR Gestational diabetes OR Diabetic OR Pre-diabetes OR pre diabetes) AND (Prevalence OR Epidemiology OR Incidence OR survey) AND (Pakistan OR Pakistani OR gilgit OR kashmir OR sindh OR punjab OR baluchistan OR khyber pakhtunkhwa OR North West Frontier Province)                                                                             |
| PakMediNet          | (Diabetes OR Diabetes mellitus OR HbA1c OR fasting glucose OR glucose intolerance OR Type 2 diabetes OR Gestational diabetes OR Diabetic OR Pre-diabetes OR pre diabetes) AND (Prevalence OR Epidemiology OR Incidence OR survey) AND (Pakistan OR Pakistani OR gilgit OR kashmir OR sindh OR punjab OR baluchistan OR khyber pakhtunkhwa OR North West Frontier Province)                                                                             |
| Scopus              | (( diabetes OR diabetes AND mellitus OR hba1c OR HbA1c OR fasting AND glucose OR glucose AND intolerance OR type 2 diabetes OR gestational AND diabetes OR diabetic OR pre-diabetes OR pre AND diabetes) AND ( prevalence OR epidemiology OR incidence OR survey ) AND ( Pakistan or Pakistani OR Gilgit OR Kashmir OR Sindh OR Sind OR Punjab OR Balochistan OR Baluchistan OR Khyber AND Pakhtunkhwa OR North AND West AND Frontier AND province ) ) |
| Cochrane            | (( diabetes OR diabetes AND mellitus OR hba1c OR HbA1c OR fasting AND glucose OR glucose AND intolerance OR type 2 diabetes OR gestational AND diabetes OR diabetic OR pre-diabetes OR pre AND diabetes) AND ( prevalence OR epidemiology OR incidence OR survey ) AND ( Pakistan or Pakistani OR Gilgit OR Kashmir OR Sindh OR Sind OR Punjab OR Balochistan OR Baluchistan OR Khyber AND Pakhtunkhwa OR North AND West AND Frontier AND province ) ) |
| CINAHL              | (( diabetes OR diabetes AND mellitus OR hba1c OR HbA1c OR fasting AND glucose OR glucose AND intolerance OR type 2 diabetes OR gestational AND diabetes OR diabetic OR pre-diabetes OR pre AND diabetes) AND ( prevalence OR epidemiology OR incidence OR survey ) AND ( Pakistan or Pakistani OR Gilgit OR Kashmir OR Sindh OR Sind OR Punjab OR Balochistan OR Baluchistan OR Khyber AND Pakhtunkhwa OR North AND West AND Frontier AND province ) ) |
